1 **RESEARCH ARTICLE**

2 **A conserved glutamate residue in RPM1-interacting protein4 is ADP-ribosylated by**  
3 ***Pseudomonas* effector AvrRpm2 to activate RPM1-mediated response**

4

5 **Minsoo Yoon<sup>1\*</sup>, Martin Middleditch<sup>2</sup>, Erik Rikkerink<sup>1</sup>**

6

7 <sup>1</sup>The New Zealand Institute for Plant and Food Research, Auckland, New Zealand

8 <sup>2</sup>University of Auckland, Auckland, New Zealand

9

10 \*Correspondence: Minsoo Yoon ([minsoo.yoon@plantandfood.co.nz](mailto:minsoo.yoon@plantandfood.co.nz))

11

12 **Short title:** Posttranslational modification of host protein RIN4 by pathogen effector

13 AvrRpm2<sub>Psa</sub>

14 **One sentence summary:** A conserved glutamate residue (E156) in the C-NOI domain of

15 RPM1-interacting protein4 is ADP-ribosylated by *Pseudomonas* effector AvrRpm2 to

16 activate RPM1-mediated defence response, independently of phosphorylation at T166.

17

## 18 ABSTRACT

19 Gram-negative bacterial plant pathogens directly inject effectors into their hosts to hijack and  
20 manipulate metabolism, eluding the frontier surveillance at the cell surface. The effector  
21 AvrRpm1<sub>Pma</sub> from *Pseudomonas syringae* pv. *maculicola* functions as an ADP-ribosyl  
22 transferase, modifying RPM1-interacting protein4 (RIN4), leading to the activation of  
23 Arabidopsis resistance protein RPM1. We identified the ADP-ribosyl transferase activity of  
24 another bacterial effector AvrRpm2<sub>Psa</sub> from *Pseudomonas syringae* pv. *actinidiae* via  
25 infection using a *Pseudomonas syringae* pv. *tomato* strain following Agrobacterium-mediated  
26 transient expression of RIN4 in *N. benthamiana*. We conducted mutational analysis in  
27 combination with mass spectrometry to genetically locate the modified residue. We show that  
28 a conserved glutamate residue (E156) of AtRIN4 is the target site for AvrRpm2<sub>Psa</sub> by  
29 demonstrating the modified AtRIN4 with E156A substitution is no longer ADP-ribosylated.  
30 Accordingly, naturally occurring soybean and snap bean RIN4 homologs with no glutamate  
31 at the positions corresponding to the E156 of AtRIN4 are not ADP-ribosylated by  
32 AvrRpm2<sub>Psa</sub>. In contrast with another effector AvrB, modifications of potential  
33 phosphorylation sites including T166 in AtRIN4 affected neither ADP-ribosylation nor  
34 RPM1 activation by AvrRpm2<sub>Psa</sub>. This study suggests that separate biochemical reactions by  
35 different pathogen effectors may trigger the activation of the same resistance protein through  
36 distinct modifications of RIN4.

37

## 38 INTRODUCTION

39 Bacterial plant pathogens such as *Pseudomonas*, *Ralstonia*, *Xanthomonas*, and *Erwinia* can  
40 cause a variety of diseases in economically important crop plants (Mansfield et al., 2012).  
41 Over long periods of co-existence, both hosts and pathogens have evolved features to combat  
42 each other (Bent and Mackey, 2007). At the battle frontier on the cell surface (Malinovsky et  
43 al., 2014), various pattern recognition receptors (Macho and Zipfel, 2015; Kong et al., 2021)  
44 sense the presence of a pathogen by recognising pathogen-associated molecular patterns  
45 (PAMPs) (Ingle et al., 2006), which are signature molecules of pathogens, for example,  
46 flagellin or lipopolysaccharides (Felix et al., 1999; Yu et al., 2021), also known as microbe-  
47 associated molecular patterns (Ausubel, 2005). Evading host surveillance at the cell wall,  
48 pathogens directly inject bacterial proteins into plant cells via a specialised delivery apparatus

49 known as the type III secretion system (T3SS) (Coombes, 2009; Buttner, 2012; Puhar and  
50 Sansonetti, 2014). Successful proliferation of pathogens depends on secreted proteins known  
51 as type III effectors (T3Es) (Alfano and Collmer, 2004; Block et al., 2008; Block and Alfano,  
52 2011).

53 Unlike PAMPs, which are fragments from bacterial molecules often conserved for essential  
54 microbial life, effectors are specially designed tools for aggressive host colonisation.  
55 Effectors may have specific enzymatic activities such as phosphorylation, ubiquitination,  
56 acetylation, proteolysis, or ADP-ribosylation (Ribet and Cossart, 2010). Once translocated  
57 inside plant cells, T3Es manipulate essential cellular processes to promote pathogen virulence  
58 and neutralize defence responses. However, this effector injection strategy is counterbalanced  
59 by another layer of host responses orchestrated by resistance (R) genes (Belkhadir et al., 2004;  
60 DeYoung and Innes, 2006). Once activated, an R gene may lead to strong defence responses  
61 including a hypersensitive responses (HR), often manifested by localised cell death to  
62 minimise the spread of infection (Guo et al., 2009; Lindeberg et al., 2012). The encoded R  
63 proteins may recognise translocated pathogen effectors via direct physical association or  
64 indirectly through perception of the enzymatic activities required for effector function (Dangl  
65 and Jones, 2001; van der Hoorn and Kamoun, 2008).

66 The T3E AvrRpm1<sub>Pma</sub> from the phytopathogen *Pseudomonas syringae* pv. *maculicola* (Pma)  
67 triggers activation of Arabidopsis resistance protein RPM1 (Mackey et al., 2002). The  
68 RPM1-mediated defence response is closely linked to the modification of RPM1-interacting  
69 protein4 (RIN4) (Chung et al., 2011; Liu et al., 2011; Xu et al., 2017). All events involved in  
70 the sequence of interactions, translocation of the bacterial effector into the host via T3SS,  
71 posttranslational modification of the host protein RIN4 (Kim et al., 2005), and the activation  
72 of resistance protein RPM1 for eventual defence response, are critical for the progression of  
73 resistance or disease (Dodds and Rathjen, 2010; Cui et al., 2015). In particular, the ubiquitous  
74 plant protein RIN4, a probable regulator of plant immunity (Rikkerink, 2018; Toruno et al.,  
75 2019), is a target for multiple effectors (Mackey et al., 2003; Chung et al., 2014; Zhao et al.,  
76 2021). However, the physiological or functional role of RIN4 is not clearly defined despite  
77 the wide distribution of this protein among plants including mosses (Afzal et al., 2013). The  
78 bacterial effector AvrRpm1<sub>Pma</sub> functions as an ADP-ribosyl transferase, modifying RIN4  
79 (Cherkis et al., 2012; Redditt et al., 2019). The target residues of AvrRpm1<sub>Pma</sub> were identified  
80 via mass spectrometry analysis following *Agrobacterium*-mediated transient expression of a

81 soybean RIN4 homolog GmRIN4b in *N. benthamiana*. It was reported that a D153  
82 substitution in the C-terminal nitrate-induced (NOI) domain of AtRIN4 inhibited  
83 phosphorylation of T166 and eventually inhibited the RPM1-mediated restriction of pathogen  
84 growth, supposedly by blocking ADP-ribosylation at this position (Redditt et al., 2019).  
85 However, it is still not clear how the ADP-ribosyl transferase activity of AvrRpm1<sub>Pma</sub>, the  
86 phosphorylation of the RIN4, and the activation of RPM1 are interconnected to initiate the  
87 host response.

88 Kiwifruit canker disease (Vanneste et al., 2013; Donati et al., 2020) caused by *Pseudomonas*  
89 *syringae* pv. *actinidiae* (Psa) was first reported in Japan (Serizawa et al., 1989) followed by  
90 China, Korea, Italy, and then it rapidly spread around the world (Fang et al., 1990; Koh et al.,  
91 1994; Scortichini, 1994; McCann et al., 2017). Psa strains collectively have about 50 T3E  
92 loci (McCann et al., 2013). While most Psa effectors have not been functionally characterised,  
93 some effectors show varying degrees of sequence similarities with previously characterised  
94 effectors from other related species such as *Pseudomonas syringae* pv. *tomato* (HopQ1<sub>Pto</sub> or  
95 HopF2<sub>Pto</sub>), *Pseudomonas syringae* pv. *syringae* (AvrRpm1<sub>Psy</sub> or HopZ3<sub>Psy</sub>), or *Pseudomonas*  
96 *syringae* pv. *maculicola* (AvrRpm1<sub>Pma</sub>), raising the possibility that some effector functions  
97 are conserved at least partially, even though the pathogens have different hosts (Cunnac et al.,  
98 2009; Baltrus et al., 2011; Dharmaraj, 2018). In particular, most Psa strains have AvrRpm2<sub>Psa</sub>  
99 loci, having about 50% protein sequence identity with AvrRpm1<sub>Pma</sub>, in various allelic forms  
100 (McCann et al., 2013; Fujikawa and Sawada, 2016), suggesting frequent selection and  
101 counter-selection during host-pathogen interactions.

102 ADP-ribosylation is a reversible posttranslational modification (PTM) catalysed by a group  
103 of enzymes known as ADP-ribosyl transferases (ARTs) (Hottiger et al., 2010). They are sub-  
104 classified based on conserved motifs of either H-Y-E (Diphtheria toxin or DTX family) or R-  
105 S-E (Cholera toxin or CTX family) in the catalytic domains (Simon et al., 2014; Mikolcevic  
106 et al., 2021). Recent studies show that ADP-ribosylation is exploited both by bacteria to  
107 achieve stealth attacks on their hosts and by plants to launch effective defence (Feng et al.,  
108 2016). Mass-spectrometry analysis has become the main analytical tool for identifying PTMs  
109 (Doll and Burlingame, 2015). However, there is a major technical limitation of mass  
110 spectrometry analysis in locating target sites of ADP-ribosylation. Due to the lability of the  
111 bond between the ADP-ribose moiety and the side-chain of the modified amino acid during  
112 fragmentation, compared with the relatively stable peptide bonds between amino acid

113 residues, generating all possible combinations of fragment ions retaining the ADP-ribose  
114 moiety is often difficult (Rosenthal et al., 2015; Hendriks et al., 2019). Combined with the  
115 fact that many different amino acid residues can be modified (Cohen and Chang, 2018),  
116 accurate localization of ADP-ribosylation can be analytically challenging.

117 Here we report the identification of the target residue in RIN4 for the bacterial effector  
118 AvrRpm2<sub>Psa</sub>, which also functions as an ADP-ribosyl transferase. To complement the  
119 limitation of mass spectrometry, which eventually could not generate all necessary  
120 combinations of fragment ions required for unambiguous identification of the modified  
121 residue, we conducted mutational analysis to genetically identify the target. To preclude  
122 potentially aberrant activities of the bacterial effectors expressed *in planta*, we delivered the  
123 bacterial protein via infection using a Pto strain instead of Agrobacterium-mediated transient  
124 expression. With the combination of mass spectrometry, mutational analysis, and infection  
125 delivery, we located a conserved glutamate residue (E156) in AtRIN4 as the target for the  
126 AvrRpm2<sub>Psa</sub> activity. We found matching polymorphisms at positions corresponding to E156  
127 of AtRIN4 with the RPM1-mediated HR phenotypes among naturally occurring RIN4  
128 homologs of soybean (*Glycine max*), snap bean (*Phaseolus vulgaris*) and apple (*Malus x*  
129 *domestica*), demonstrating that the RIN4 target site for this effector is conserved across plant  
130 species.

131

## 132 **RESULTS AND DISCUSSION**

### 133 **AvrRpm2<sub>Psa</sub> functions as an ADP-ribosyl transferase modifying RIN4**

134 Sequence alignment with known ADP-ribosyl transferases such as diphtheria toxin or  
135 Exotoxin A (Exo T) suggested that AvrRpm1<sub>Pma</sub> has three conserved residues (H63, Y122,  
136 and D185) in catalytic domains (Cherkis et al., 2012). It was later biochemically shown that  
137 AvrRpm1<sub>Pma</sub> functions as an ADP-ribosyl transferase to modify RIN4, leading to the  
138 activation of Arabidopsis resistance protein RPM1 (Redditt et al., 2019). AvrRpm1<sub>Pma</sub> has the  
139 H-Y-D motif in potential catalytic domains and therefore may be classified as a member of  
140 the DTX family along with *Pseudomonas aeruginosa* Exo T, a T3E required for full  
141 virulence in animal model of an acute pneumonia, which has the H-Y-E motif (Garrity-Ryan  
142 et al., 2004). While AvrRpm2<sub>Psa</sub> shares about 50% protein sequence with AvrRpm1<sub>Pma</sub>, the

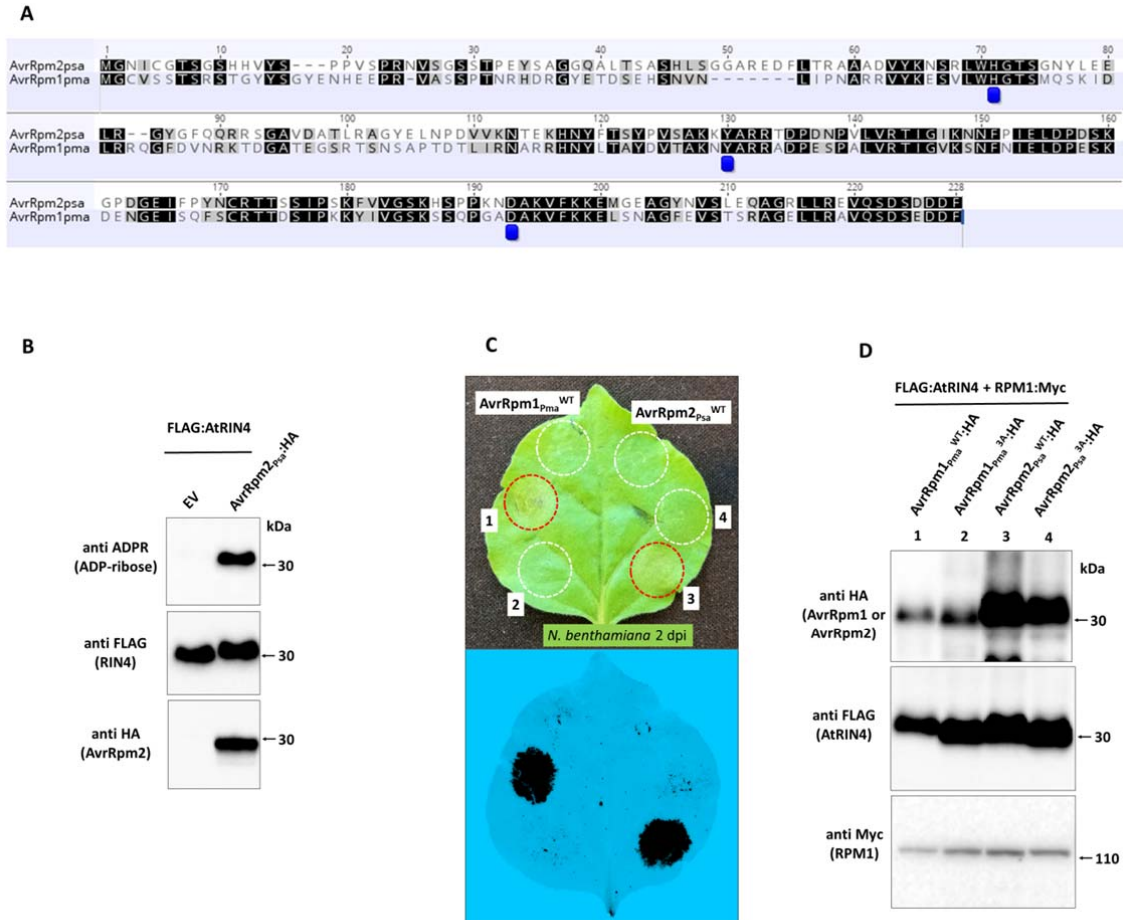

**Figure 1.** Transient co-expression of AtRIN4 and AvrRpm2<sub>Psa</sub> (biovar 5) in *N. benthamiana* via *Agrobacterium*. **A.** Sequence alignment of AvrRpm2<sub>Psa</sub> and AvrRpm1<sub>Pma</sub>. The residues (H63, Y122, and D185) in the conserved H-Y-D motif of AvrRpm1<sub>Pma</sub>, proposed previously (Cherkis et al., 2012), are marked with blue labels. The corresponding residues in the H-Y-D motif of AvrRpm2<sub>Psa</sub> are H68, Y125, and D188. **B.** Western blot analysis demonstrating the ADP-ribosyl transferase activity of AvrRpm2<sub>Psa</sub>. Proteins were extracted from *N. benthamiana* leaves co-expressing AvrRpm2<sub>Psa</sub>:HA and FLAG:AtRIN4 via *Agrobacterium* at 2 d post infiltration. ADP-ribosylated proteins were detected using the anti ADPR binding reagent. FLAG:RIN4 and AvrRpm2<sub>Psa</sub>:HA were detected using corresponding antibodies. **C.** RPM1-mediated HR (hypersensitive response) assay. An *N. benthamiana* leaf co-expressing FLAG:AtRIN4 and RPM1:Myc with either AvrRpm1<sub>Pma</sub> or AvrRpm1<sub>Pma</sub> in different combinations (1: AvrRpm1<sub>Pma</sub><sup>WT</sup>:HA (wild type); 2: AvrRpm1<sub>Pma</sub><sup>3A</sup> (triple substitutions: H63A, Y122A, D185A); 3: AvrRpm2<sub>Psa</sub><sup>WT</sup>:HA (wild type); 4: AvrRpm2<sub>Psa</sub><sup>3A</sup> (triple substitutions: H68A, Y125A, D188A) delivered via *Agrobacterium*. Red circles denote HR and white circles denote no HR. The fluorescence of the same leaf monitored under a 488 nm light source in the ChemiDoc™ is also shown (bottom). Images were taken 2 d post *Agrobacterium* infiltration. **D.** Western blot analysis using proteins extracted from the corresponding areas of the leaf used in **C** 2 d post *Agrobacterium* injection.

143 proposed three critical residues (H-Y-D) in AvrRpm1<sub>Pma</sub> are also conserved in AvrRpm2<sub>Psa</sub>  
 144 (Figure 1A).

145 We tested AvrRpm2<sub>Psa</sub> for its function as an ADP-ribosyl transferase. Proteins were extracted  
 146 from *N. benthamiana* leaves transiently co-expressing AtRIN4 and AvrRpm2<sub>Psa</sub> via  
 147 *Agrobacterium*. When Western blot analysis was performed using anti-ADPR binding  
 148 reagent to detect ADP-ribosylated proteins, the AtRIN4 protein band was detected,  
 149 demonstrating that AvrRpm2<sub>Psa</sub> functions as an ADP-ribosyl transferase modifying AtRIN4  
 150 (Figure 1B). When AvrRpm2<sub>Psa</sub> was co-expressed with AtRIN4 and RPM1 via

151 *Agrobacterium* in *N. benthamiana*, an RPM1-mediated HR was observed (Figure 1C, top).  
152 When the fluorescence from the infiltrated leaf was monitored in the ChemiDoc™ with trays  
153 specific for 488nm, loss of green specks due to cell collapse were more clearly visible (Figure  
154 1C, bottom) (Yoon and Rikkerink, 2020). As reported previously, modifications of the three  
155 sites (H-Y-D) in AvrRpm1<sub>Pma</sub> (AvrRpm1<sub>Pma</sub><sup>3A</sup> with triple substitutions at H63A, Y122A, and  
156 D185A) resulted in the loss of the RPM1-mediated HR (Cherkis et al., 2012; Redditt et al.,  
157 2019). Modifications of the three corresponding residues in AvrRpm2<sub>Psa</sub> (AvrRpm2<sub>Psa</sub><sup>3A</sup> with  
158 the corresponding triple substitutions at H68A, Y125A, and D188A) similarly resulted in the  
159 loss of the RPM1-mediated response, demonstrating the importance of the H-Y-D motif in  
160 the two bacterial effectors. Western blot analysis (Figure 1D) showed that the modified  
161 proteins accumulated similarly when compared with their corresponding wild type proteins,  
162 suggesting the observed differences in the HR are due to the changes in their biochemical  
163 activities, not in their accumulation.

164

165 RIN4 is a widely-distributed plant protein capable of physically associating with other  
166 proteins, making multi-protein complexes (Sun et al., 2014; Rikkerink, 2018; Ray et al.,  
167 2019). There are several bacterial effectors known to physically associate with RIN4,  
168 including AvrB (Lee et al., 2004), AvrRpm1<sub>Pma</sub> (Mackey et al., 2002), AvrRpm1<sub>Psa</sub> (Yoon  
169 and Rikkerink, 2020), HopF2<sub>Pto</sub> (Wilton et al., 2010), and HopZ3<sub>Psy</sub> (Lee et al., 2015b),  
170 suggesting frequent participation of RIN4 in pathogen-plant interactions. To test the protein  
171 association with RIN4, AvrRpm2<sub>Psa</sub> with an epitope tag (AvrRpm2<sub>Psa</sub>:HA) was co-expressed  
172 with AtRIN4, tagged with a different epitope (FLAG:AtRIN4), in *N. benthamiana* via  
173 *Agrobacterium*. Both proteins were detected in the Western blot analysis with corresponding  
174 antibodies (Figure 2A). Proteins were immunoprecipitated with anti HA-conjugated magnetic  
175 beads to isolate AvrRpm2<sub>Psa</sub>. Western blot analysis showed that AtRIN4 was co-precipitated  
176 with AvrRpm2<sub>Psa</sub>, showing AtRIN4 physically associated with AvrRpm2<sub>Psa</sub> (Figure 2A, third  
177 lane, Co-IP panel). There was no comparable AtRIN4 co-precipitated with the empty vector  
178 (EV) or HA-tagged AtRIN4 (HA:AtRIN4), showing the protein-protein interaction between  
179 AvrRpm2<sub>Psa</sub> and AtRIN4 was specific. AtRIN4 co-expressed with AvrRpm2<sub>Psa</sub> showed a  
180 change in mobility during electrophoresis. As shown in the Western blot analysis, AtRIN4  
181 co-expressed with AvrRpm2<sub>Psa</sub> (Figure 2B, even-numbered) showed a consistently slower  
182 migration in SDS-PAGE compared with those from leaves without AvrRpm2<sub>Psa</sub> (odd-



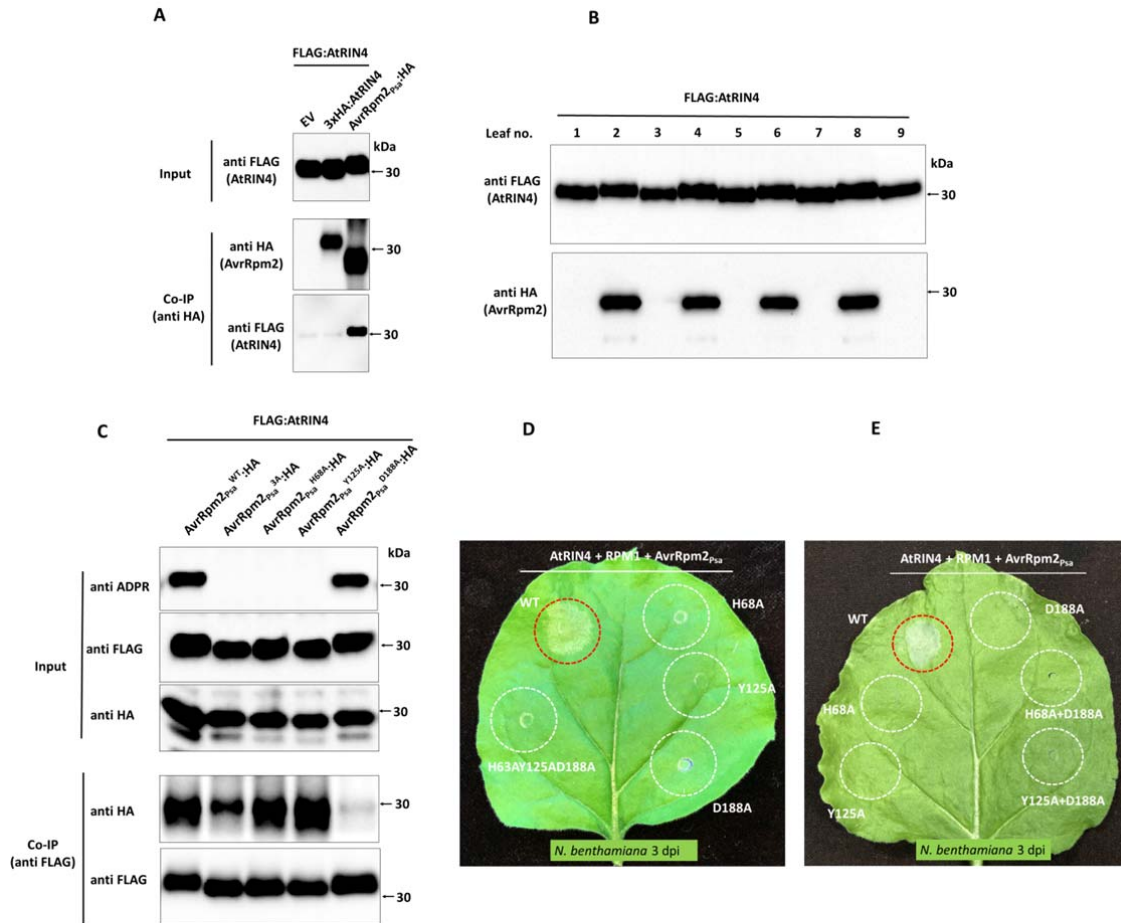

**Figure 2.** Western blot analysis of AtRIN4 transiently co-expressed with AvrRpm2<sub>Psa</sub> in *N. benthamiana* via *Agrobacterium*. **A.** Proteins were extracted from *N. benthamiana* leaves co-expressing FLAG:AtRIN4 with either Empty vector (lane 1), HA:AtRIN4 (lane 2), or AvrRpm2<sub>Psa</sub>:HA (lane 3) via *Agrobacterium*. Protein extracts were immunoprecipitated using anti HA magnetic beads. Precipitated proteins were probed with corresponding antibodies. **B.** Western blot analysis showed the ADP-ribosylated AtRIN4 migrated more slowly compared with unmodified AtRIN4 during SDS-PAGE. Protein extracts from *N. benthamiana* leaves co-expressing FLAG:AtRIN4 with AvrRpm2<sub>Psa</sub>:HA (even-numbered) or expressing only FLAG:AtRIN4 (odd-numbered) were probed. **C.** Western blot analysis of different AvrRpm2<sub>Psa</sub> alleles (AvrRpm2<sub>Psa</sub><sup>WT</sup>, AvrRpm2<sub>Psa</sub><sup>H68A</sup>, AvrRpm2<sub>Psa</sub><sup>Y125A</sup>, AvrRpm2<sub>Psa</sub><sup>H188A</sup>, and AvrRpm2<sub>Psa</sub><sup>3A</sup>) co-expressed with AtRIN4 via *Agrobacterium* (Input panel). For Co-IP of modified AvrRpm2 with AtRIN4 (Co-IP panels), protein extracts were precipitated using anti FLAG magnetic beads to isolate FLAG:AtRIN4. Precipitated proteins were probed using corresponding antibodies. **D.** Modified AvrRpm2 alleles (AvrRpm2<sub>Psa</sub><sup>H68A</sup>, AvrRpm2<sub>Psa</sub><sup>Y125A</sup>, and AvrRpm2<sub>Psa</sub><sup>D188A</sup>) were co-expressed with RPM1 and AtRIN4 on an *N. benthamiana* leaf to assess the corresponding RPM1-mediated HR. **E.** Combinations of modified AvrRpm2 alleles (AvrRpm2<sub>Psa</sub><sup>D188A</sup> with AvrRpm2<sub>Psa</sub><sup>H68A</sup> and AvrRpm2<sub>Psa</sub><sup>D188A</sup> with AvrRpm2<sub>Psa</sub><sup>Y125A</sup>) were co-expressed with RPM1 and AtRIN4 on an *N. benthamiana* leaf. Red circles denote HR and white circles denote no HR. Images were taken at 3 d post *Agrobacterium* injection (**D** and **E**).

183 numbered), suggesting a change in the structure of the ADP-ribosylated RIN4 compared with  
 184 the unmodified RIN4. Similar changes in the mobility of RIN4 during electrophoresis were  
 185 reported previously with co-expressed AvrRpm1<sub>Pma</sub> (Redditt et al., 2019).

186

### 187 Modifications in the H-Y-D motif of AvrRpm2<sub>Psa</sub> affect activity or affinity

188 Modified AvrRpm1<sub>Pma</sub> with either H63A, Y122A, or D185A substitution resulted in  
 189 significant loss in the RPM1-mediated restriction of pathogen growth in *Arabidopsis* (Cherkis

190 et al., 2012). We made corresponding substitutions of H68A, Y125A, and D188A in the H-Y-  
191 D motif of AvrRpm2<sub>Psa</sub> to create AvrRpm2<sub>Psa</sub><sup>H68A</sup>, AvrRpm2<sub>Psa</sub><sup>Y125A</sup>, and AvrRpm2<sub>Psa</sub><sup>D188A</sup> to  
192 analyse their activities as well as their abilities to physically associate with AtRIN4. Proteins  
193 were extracted from *N. benthamiana* leaves co-expressing the modified AvrRpm2<sub>Psa</sub> with  
194 AtRIN4 via Agrobacterium. Western blot analysis showed that AvrRpm2<sub>Psa</sub><sup>H68A</sup>,  
195 AvrRpm2<sub>Psa</sub><sup>Y125A</sup> lost the catalytic activity to modify AtRIN4 while AvrRpm2<sub>Psa</sub><sup>D188A</sup>  
196 retained the activity (Figure 2C, anti ADPR in Input panel ). In contrast, Co-IP analysis  
197 showed that AvrRpm2<sub>Psa</sub><sup>D188A</sup> lost the physical association with AtRIN4 while  
198 AvrRpm2<sub>Psa</sub><sup>H68A</sup> and AvrRpm2<sub>Psa</sub><sup>Y125A</sup> still associated with RIN4 (Figure 2C, anti HA in Co-  
199 IP panel). When the modified AvrRpm2<sub>Psa</sub> proteins were co-expressed with AtRIN4 and  
200 RPM1 in *N. benthamiana* via Agrobacterium, all three individual substitutions (H68A,  
201 Y125A, or D188A) resulted in the loss of the corresponding RPM1-mediated HR (Fig 2D).  
202 Therefore, for the bacterial effector to activate RPM1, the ability to physically associate with  
203 RIN4 is also required in addition to the functional ability to modify RIN4. Next, we co-  
204 expressed AvrRpm2<sub>Psa</sub><sup>H68A</sup> and AvrRpm2<sub>Psa</sub><sup>D188A</sup> in *N. benthamiana* with AtRIN4 and RPM1  
205 to see whether RPM1 can be activated by the catalytic activity of AvrRpm2<sub>Psa</sub><sup>D188A</sup> to modify  
206 AtRIN4 while the protein association with AtRIN4 can be separately provided by  
207 AvrRpm2<sub>Psa</sub><sup>H68A</sup>. We also similarly tested the combined expression of AvrRpm2<sub>Psa</sub><sup>Y125A</sup> with  
208 AvrRpm2<sub>Psa</sub><sup>D188A</sup>. Neither combination triggered the corresponding RPM1-mediated HR in *N.*  
209 *benthamiana*, demonstrating that the protein association with AtRIN4 and the catalytic  
210 activity to modify AtRIN4 cannot be separately provided to activate RPM1 (Figure 2E).

211

### 212 **Mass spectrometry analysis of AtRIN4 co-expressed with AvrRpm1<sub>Pma</sub> in *N.*** 213 ***benthamiana* via Agrobacterium**

214 Previously, two residues N12 and D185 in GmRIN4b were identified as the target sites for  
215 AvrRpm1<sub>Pma</sub> (Redditt et al., 2019). To locate the target residue(s) in AtRIN4 for the  
216 AvrRpm2<sub>Psa</sub> activity, we adopted a similar approach. As a preliminary control analysis we  
217 first analysed the ADP-ribosylation of AtRIN4 with co-expressed AvrRpm1<sub>Pma</sub>. An N-FLAG  
218 tagged AtRIN4 (FLAG:AtRIN4) was co-expressed with AvrRpm1<sub>Pma</sub> in *N. benthamiana* via  
219 Agrobacterium and isolated by immunoprecipitation using anti FLAG-conjugated magnetic  
220 beads (Figure S1A). The protein band corresponding to AtRIN4 was excised from the gel and  
221 confirmed by Western blot analysis (Figure S1B). After LC-MS/MS analysis of the excised

222 AtRIN4 protein band, we detected ADP-ribosylated peptides from the two nitrate-induced  
223 (NOI) domains. Available fragment evidence suggested that two residues (N157 and N158)  
224 in the C-NOI domain and the corresponding two residues (E16 and N17) in the N-NOI  
225 domain were likely to be ADP-ribosylated. Not every possible combination of fragment ions  
226 were recovered, and most ADP-ribose moieties identified were in degraded forms such as  
227 phospho-ribose or ribose, suggesting the lability of the ADP-ribose moiety during  
228 fragmentation. Examples of fragmentation data are shown in Figure S1C and Figure S1D.

229 The target sites of AvrRpm1<sub>Pma</sub> previously identified in GmRIN4b (N12 and D185)  
230 correspond to N11 and D153 in AtRIN4, respectively (Redditt et al., 2019), which are clearly  
231 distinct from the target residues we identified (E16, N17, N157, N158) by directly analysing  
232 AtRIN4. In an effort to resolve the discrepancy, we created modified RIN4 alleles by  
233 replacing target sites identified by both analyses with alanine to prevent modification on  
234 these sites. GmRIN4<sup>N12AD185A</sup> and corresponding AtRIN4<sup>N11AD153A</sup> were created based on the  
235 earlier analysis of GmRIN4b, and AtRIN4<sup>E16AN17AN157AN158A</sup> was created based on our mass  
236 spectrometry analysis. Proteins were extracted from *N. benthamiana* leaves co-expressing  
237 AvrRpm1<sub>Pma</sub> with the modified RIN4 proteins via Agrobacterium. Western blot analysis  
238 showed that all of the modified RIN4 proteins were still ADP-ribosylated (Figure S2A and  
239 Figure S2B) and also activated RPM1 (Figure S2C). Even when further modification with all  
240 six residues (N11, E16, N17, D153, N157, and N158) collectively identified by both analyses  
241 were replaced, the modified protein (AtRIN4<sup>E11AE16AN17AD153AN157AN158A</sup>) was still ADP-  
242 ribosylated when co-expressed with AvrRpm1<sub>Pma</sub> (Figure S2B).

243 The absence of the target residues identified by the mass spectrometry analyses affected  
244 neither the ADP-ribosylation by AvrRpm1<sub>Pma</sub> nor the activation of RPM1. Therefore, the  
245 identification of target residues may have been incorrect with the wrong residues identified  
246 due to the hyperactivity of the bacterial effector expressed *in planta* via Agrobacterium, or  
247 the mass spectrometry analyses were incomplete with other target residues still unidentified  
248 due to the lability of the bonds between ADP-ribose moieties and amino acids side chains.  
249 Another possibility is that there are preferences for AvrRpm1<sub>Pma</sub> among multiple residues and  
250 that some sites are modified only when more preferred sites are absent. We similarly  
251 analysed AtRIN4 co-expressed with AvrRpm2<sub>Psa</sub> in *N. benthamiana* via Agrobacterium.  
252 Compared with AvrRpm1<sub>Pma</sub>, fewer ADP-ribosylated peptides were identified with  
253 AvrRpm2<sub>Psa</sub> (Figure S3A) and the intensities of fragment ions were lower in the MS/MS

254 spectra (Figure S3B). Available fragmentation spectra suggested that the target site was likely  
255 to be in the C-NOI domain. However, not all combinations of fragment ions were generated  
256 and unambiguous identification of the target site was difficult.

257

## 258 **Bacterial effectors can be efficiently delivered into *N. benthamiana* by Pto DC3000Q<sup>-</sup>**

259 Even though a few modified residues were identified, we still could not biochemically verify  
260 them as real targets (Figure S2). In particular, it cannot be ruled out that the bacterial  
261 effectors expressed *in planta* via Agrobacterium may not have identical properties to the  
262 secreted effector via T3SS during an infection. Therefore, we compared the activities of  
263 T3SS-delivered effectors with those of the effectors expressed *in planta* via Agrobacterium.  
264 Previously, we developed a pathogen assay system in *N. benthamiana* by co-injecting  
265 Agrobacterium and the Pto DC3000 strain without hopQ1 (Wei et al., 2007), Pto DC3000Q<sup>-</sup>,  
266 simultaneously (Yoon and Rikkerink 2020). At low bacterial concentrations (OD<sub>600</sub>=0.00001  
267 to 0.0001 for Pto DC3000Q<sup>-</sup> and OD<sub>600</sub>=0.01 to 0.04 for Agrobacterium), Agrobacterium and  
268 Pto DC3000Q<sup>-</sup> did not interfere with each other, facilitating bacterial pathogen growth assays.  
269 Buscaill et al (2021) reported a similar disease assay based on sequential infection of Pto  
270 DC3000Q<sup>-</sup> following Agrobacterium-mediated transient expression in *N. benthamiana*  
271 (Buscaill et al., 2021).

272 By adopting a similar sequential approach, we first transiently expressed RIN4 in *N.*  
273 *benthamiana* via agrobacterium. At 2 d post infiltration of Agrobacterium, the leaves pre-  
274 infiltrated with Agrobacterium were infected with Pto DC3000Q<sup>-</sup>(AvrRpm2<sub>Psa</sub>) at a high  
275 bacterial concentration (OD<sub>600</sub>=1.0). There were no significant differences in RIN4  
276 accumulation with Agrobacterium concentrations of OD<sub>600</sub>=0.02 to 0.4. The *N. benthamiana*  
277 leaf areas infected with Pto DC3000Q<sup>-</sup>(AvrRpm2<sub>Psa</sub>) showed clear signs of infection at 15 h  
278 post infiltration (Figure 3A). At 1 d post infection of Pto DC3000Q<sup>-</sup>(AvrRpm2<sub>Psa</sub>), proteins  
279 were extracted from the infected leaves for Western blot analysis. The ADP-ribosylation of  
280 RIN4 was clearly detected from a Western blot prepared with the protein extracts without  
281 further fractionation or concentration (Figure 3B). In the transgenic Arabidopsis-Pto DC3000  
282 system, expressing high concentration of proteins is difficult because host cells collapse as  
283 infections progress. In this Agrobacterium-DC3000Q<sup>-</sup> system in *N. benthamiana*,  
284 Agrobacterium-mediated transient expression prior to pathogen infection ensured high

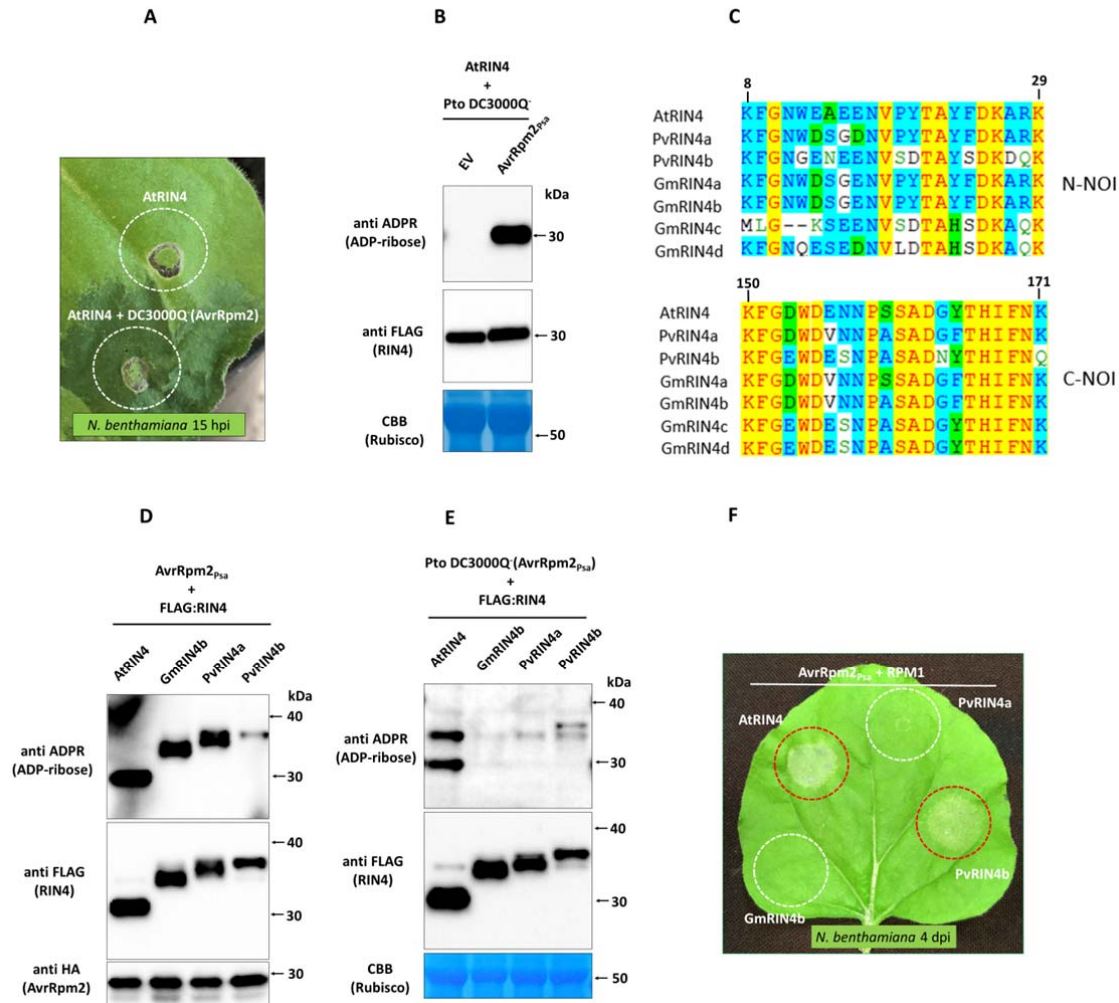

**Figure 3.** Secretion of bacterial effector via infection of Pto DC3000Q in *N. benthamiana*. **A.** An *N. benthamiana* leaf was infected with Pto DC3000Q (AvrRpm2<sub>Psa</sub>) at a high concentration ( $OD_{600}=1.0$ , or  $5 \times 10^8$  cfu/mL) in the area pre-infiltrated with Agrobacterium 2 d earlier for transient expression of AtRIN4 (marked with a circle, bottom). Dark discoloration and leaf margin malformations indicate Pto infection. The control area infiltrated only with Agrobacterium is also marked (top). Image was taken at 15 h post infection. **B.** Western blot analysis demonstrated that AtRIN4 was ADP-ribosylated upon infection with Pto DC3000Q (AvrRpm2<sub>Psa</sub>). Proteins were extracted from *N. benthamiana* leaves expressing AtRIN4 via Agrobacterium after infection with Pto DC3000Q (AvrRpm2<sub>Psa</sub>). ADP-ribosylated proteins were detected using anti ADPR binding reagent. (EV: control Pto DC3000Q with an empty vector). **C.** Alignment of the two NOI sequences in RIN4 homologs of Arabidopsis (AtRIN4), snap bean (PvRIN4a and PvRIN4b) and soybean (GmRIN4a to GmRIN4d). **D.** Western blot analysis of RIN4 co-expressed with AvrRpm2<sub>Psa</sub> *in planta* via Agrobacterium. **E.** Western blot analysis of RIN4 homologs infected with Pto DC3000Q (AvrRpm2<sub>Psa</sub>). Proteins were extracted as in (B). **F.** The indicated RIN4 homologs were co-expressed with AvrRpm2<sub>Psa</sub> and RPM1 in different areas of an *N. benthamiana* leaf via Agrobacterium to assess the corresponding RPM1-mediated HR. Red circles denote HR and white circles denote no HR.

285 accumulation of RIN4 protein while through infection the expressed bacterial effector was  
 286 efficiently secreted from the highly concentrated Pto DC3000Q (AvrRpm2<sub>Psa</sub>) into the host,  
 287 facilitating the detection of the posttranslational modification.

288

289 **Bacterial effectors expressed *in planta* via Agrobacterium may differ in activity to**  
 290 **effectors translocated via T3SS**

291 Among the four soybean RIN4 homologs, GmRIN4a and GmRIN4b were ADP-ribosylated  
292 when co-expressed with AvrRpm1<sub>P<sub>ma</sub></sub> while GmRIN4c or GmRIN4d were not modified  
293 (Redditt et al., 2019). To compare AvrRpm2<sub>P<sub>sa</sub></sub> expressed *in planta* via Agrobacterium with  
294 the bacterial effector secreted during an infection, we analysed the ADP-ribosylation in RIN4  
295 homologs of Arabidopsis, soybean, and snap bean (AtRIN4, GmRIN4b, PvRIN4a, and  
296 PvRIN4b). PvRIN4a is more closely related to GmRIN4a and GmRIN4b, while PvRIN4b is  
297 more similar to GmRIN4c or GmRIN4d (Figure 3C). Proteins were extracted from *N.*  
298 *benthamiana* leaves co-expressing these RIN4 homologs and AvrRpm2<sub>P<sub>sa</sub></sub> via Agrobacterium.  
299 Western blot analysis showed that all four RIN4 proteins were ADP-ribosylated (Figure 3D,  
300 anti ADPR). In particular, among the two snap bean RIN4 homologs, PvRIN4a was more  
301 strongly ADP-ribosylated compared with PvRIN4b. In the next, proteins were extracted from  
302 the leaves infected with Pto DC3000Q<sup>-</sup> (AvrRpm2<sub>P<sub>sa</sub></sub>) following transient expression of RIN4  
303 homologs via Agrobacterium. Western blot analysis showed that only AtRIN4 and PvRIN4b  
304 were ADP-ribosylated and GmRIN4b and PvRIN4a were not modified (Figure 3E).  
305 Modifications in AtRIN4 or PvRIN4b were not significantly different between the two  
306 effector deliveries either by the Agrobacterium-mediated transient expression of AvrRpm2<sub>P<sub>sa</sub></sub>  
307 or by the infection of Pto DC3000Q<sup>-</sup> (AvrRpm2<sub>P<sub>sa</sub></sub>).

308 Interestingly, when the RIN4 homologs were co-expressed with AvrRpm2<sub>P<sub>sa</sub></sub> and RPM1 in *N.*  
309 *benthamiana* via Agrobacterium, only AtRIN4 and PvRIN4b triggered the RPM1-mediated  
310 HR (Figure 3F). In contrast, GmRIN4b or PvRIN4a resulted in no comparable HR even  
311 though they were also ADP-ribosylated by AvrRpm2<sub>P<sub>sa</sub></sub> (Figure 3D). We reasoned that the  
312 ADP-ribosylation in GmRIN4b and PvRIN4a may have been caused by an unusual activity  
313 of the bacterial effector expressed *in planta* via Agrobacterium. Such modifications may be  
314 artefacts created in our experimental system and may not naturally occur during pathogen  
315 infection. We conclude that mass spectrometry analysis of a bacterial effector expressed *in*  
316 *planta* via Agrobacterium may not always lead to a *bona fide* identification of ADP-  
317 ribosylation catalysed by the T3SS-delivered bacterial effector during an infection.

318

### 319 **Identification of the AvrRpm2<sub>P<sub>sa</sub></sub> target site by mutational analysis**

320 After carefully studying available mass spectra of AtRIN4 peptides, we hypothesised that the  
321 target sites are within the NOI domains, and performed mutational analysis by changing

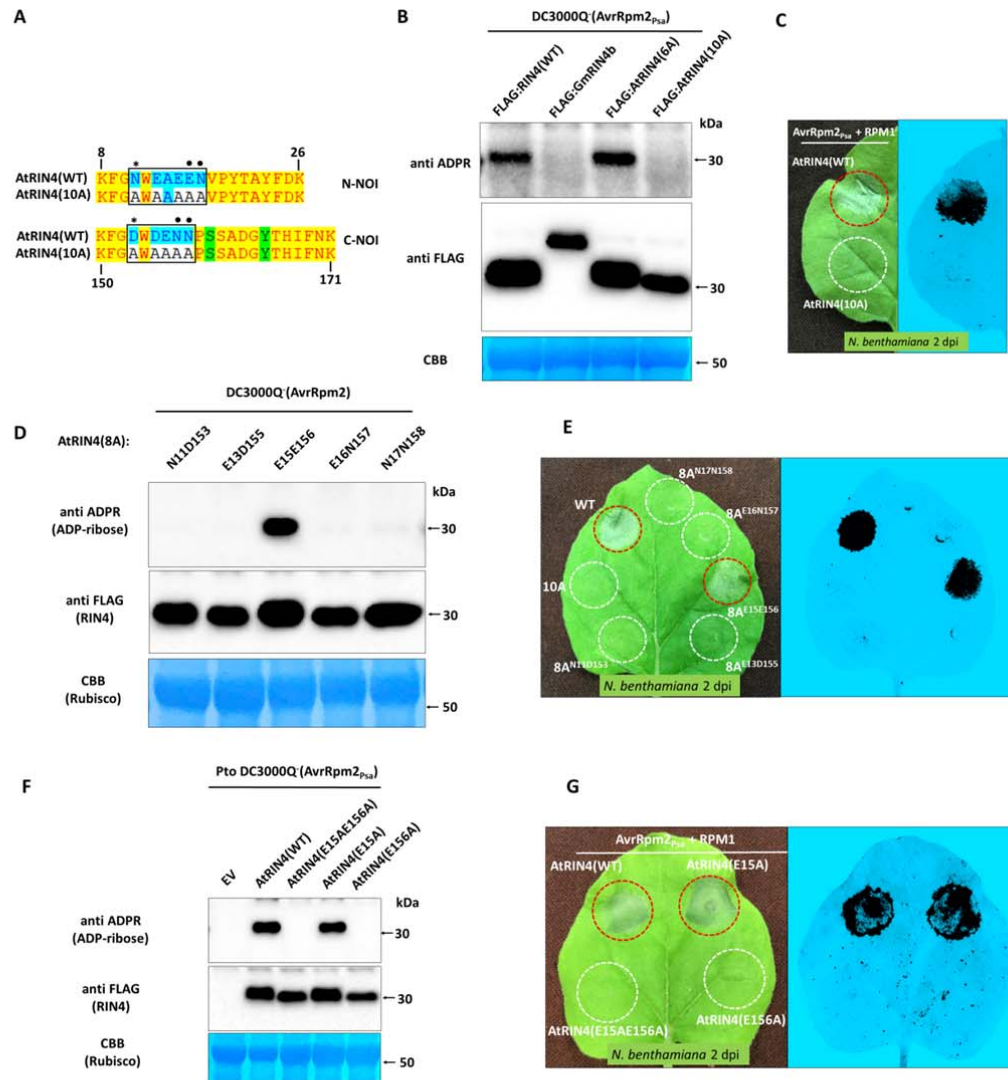

**Figure 4.** Identification of the target residue for AvrRpm2<sub>Psa</sub> by mutational analysis. **A.** Modifications generated in the two NOI sequences of AtRIN4 (top). The ten modifications in target amino acids N, D, and E (N11A, E13A, E15A, E16A, N17A, D153A, D155A, E156A, N157A, N158A) in AtRIN4<sup>10A</sup> are boxed in black (□) and the six modifications in AtRIN4<sup>6A</sup> (N11A, E16A, N17D, D153A, N157A, N158A) are marked with asterisk (\*) for the residues N11 and D153 identified as candidates previously (Redditt et al., 2019) or closed circle (● in E16, N17, N157, and N158 identified as candidates by this study). AtRIN4<sup>10A</sup> was co-expressed with AvrRpm2<sub>Psa</sub> and RPM1 in *N. benthamiana*, to assess the RPM1-mediated HR when (bottom). HR was assessed visually or by monitoring fluorescence with ChemiDoc™ at 2 d post Agrobacterium infiltration. **B.** Western blot analysis of RIN4 alleles (AtRIN4<sup>WT</sup>, GmRIN4b<sup>WT</sup>, AtRIN4<sup>6A</sup> and AtRIN4<sup>10A</sup>) from leaves infected with with Pto DC3000Q(AvrRpm2<sub>Psa</sub>) (left). Proteins were extracted 1 d post infection of Pto DC3000Q(AvrRpm2<sub>Psa</sub>) in *N. benthamiana* leaves pre-infiltrated with Agrobacterium 2 d earlier for transient expression of RIN4. To assess the RPM1-mediated HR, AtRIN4 proteins were co-expressed with AvrRpm2<sub>Psa</sub> and RPM1 in *N. benthamiana* (right). The fluorescence image captured in ChemiDoc™ at 2 d post Agrobacterium infiltration is shown. **C.** Western blot analysis of the five AtRIN4<sup>8A</sup> variant proteins (AtRIN4<sup>8A</sup><sub>E11D153</sub>, AtRIN4<sup>8A</sup><sub>E13D155</sub>, AtRIN4<sup>8A</sup><sub>E15E156</sub>, AtRIN4<sup>8A</sup><sub>E16N157</sub>, and AtRIN4<sup>8A</sup><sub>E17N158</sub>) from leaves infected with Pto DC3000Q(AvrRpm2<sub>Psa</sub>). Proteins were extracted as in (B). **D.** The five AtRIN4<sup>8A</sup> proteins were co-expressed with AvrRpm2<sub>Psa</sub> and RPM1 in *N. benthamiana* via Agrobacterium to assess the corresponding HR. Visual inspection (left) and fluorescence test using the ChemiDoc™ (right) are shown. **E.** Western blot analysis of AtRIN4 proteins (AtRIN4<sup>WT</sup>, AtRIN4<sup>E15AE156A</sup>, AtRIN4<sup>E15A</sup>, and AtRIN4<sup>E156A</sup>) from leaves infected with Pto DC3000Q(AvrRpm2<sub>Psa</sub>). Proteins were extracted as in (B). **F.** AtRIN4 proteins (AtRIN4<sup>WT</sup>, AtRIN4<sup>E15AE156A</sup>, AtRIN4<sup>E15A</sup>, and AtRIN4<sup>E156A</sup>) were co-expressed with AvrRpm2<sub>Psa</sub> and RPM1 in *N. benthamiana* to assess HR. The visual inspection (left) and the fluorescence test with the ChemiDoc™ (right) are shown. Red circles denote HR and white circles denote no HR.

322 candidate residues in the NOI domain sequences. Based on the results from previous mass  
 323 spectrometry analyses, we tested AtRIN4<sup>6A</sup>, in which the six residues (N11, E16, N17, D153,  
 324 N157, and N158) collectively identified by earlier analyses as targets were replaced with  
 325 alanine (A) to prevent modification on these sites (Figure 4A). Western blot analysis showed  
 326 that AtRIN4<sup>6A</sup> was still ADP-ribosylated by Pto DC3000Q(AvrRpm2<sub>Psa</sub>) (Figure 4B). We

327 further replaced four more residues to create AtRIN4<sup>10A</sup>. The modified ten residues were the  
328 five amino acids (N11, E13, E15, E16, and N17) in the N-NOI domain and the corresponding  
329 five residues (D153, D155, E156, N157, and N158) in the C-NOI domain. Western blot  
330 analysis showed that AtRIN4<sup>10A</sup> was no longer ADP-ribosylated by Pto DC3000Q<sup>-</sup>  
331 (AvrRpm2<sub>Psa</sub>) (Figure 4B). When AtRIN4<sup>10A</sup> was co-expressed with RPM1 and AvrRpm2<sub>Psa</sub>  
332 in *N. benthamiana* via Agrobacterium, no HR was detected compared with AtRIN4<sup>WT</sup>,  
333 suggesting RPM1 was not activated (Figure 4C, white circle). In the next step, we  
334 systematically reinstated two original residues at a time in AtRIN4<sup>10A</sup> (one in the N-NOI  
335 domain and the corresponding other in the C-NOI domain) to create five different AtRIN4<sup>8A</sup>  
336 alleles (AtRIN4<sup>8A</sup><sub>N11D153</sub>, AtRIN4<sup>8A</sup><sub>E13D155</sub>, AtRIN4<sup>8A</sup><sub>E15E156</sub>, AtRIN4<sup>8A</sup><sub>N16N157</sub>, and  
337 AtRIN4<sup>8A</sup><sub>N17N158</sub>). The five AtRIN4<sup>8A</sup> proteins were transiently expressed in *N. benthamiana*  
338 via Agrobacterium and the leaves were infected with Pto DC3000Q<sup>-</sup>(AvrRpm2<sub>Psa</sub>). When  
339 proteins were extracted and Western blot analysis was performed, we found that ADP-  
340 ribosylation was restored in AtRIN4<sup>8A</sup><sub>E15E156</sub>, while the other four AtRIN4<sup>8A</sup> alleles were not  
341 modified by AvrRpm2<sub>Psa</sub> (Figure 4D). Accordingly, when the AtRIN4<sup>8A</sup> proteins were co-  
342 expressed with AvrRpm2<sub>Psa</sub> and RPM1 in *N. benthamiana* via Agrobacterium, only  
343 AtRIN4<sup>8A</sup><sub>E15E156</sub> triggered the RPM1-mediated HR, matching the genotype with both the  
344 biochemical and physiological phenotypes (Figure 4E).

345 As AtRIN4<sup>8A</sup><sub>E15E156</sub> recovered ADP-ribosylation from AtRIN4<sup>10A</sup>, the target residue(s) for the  
346 AvrRpm2<sub>Psa</sub> activity could be either E15, E156, or both residues. We created the double  
347 mutant allele AtRIN4<sup>E15AE156A</sup>, which is the reciprocal modification of AtRIN4<sup>8A</sup><sub>E15E156</sub>, as  
348 well as the two single mutant alleles AtRIN4<sup>E15A</sup> and AtRIN4<sup>E156A</sup>. They were transiently  
349 expressed in *N. benthamiana* via Agrobacterium and the leaves were infected with Pto  
350 DC3000Q<sup>-</sup>(AvrRpm2<sub>Psa</sub>) as above. Western blot analysis showed that AtRIN4<sup>E15AE156A</sup> was  
351 not ADP-ribosylated as expected (Figure 4F). Out of the two individually modified proteins,  
352 AtRIN4<sup>E156A</sup> was not ADP-ribosylated while AtRIN4<sup>E15A</sup> was still modified, demonstrating  
353 that the glutamate (E156) in the C-NOI domain is the target site for AvrRpm2<sub>Psa</sub> during  
354 infection. When the AtRIN4 proteins were co-expressed with AvrRpm2<sub>Psa</sub> and RPM1 in *N.*  
355 *benthamiana* via Agrobacterium, the RPM1-mediated HR was lost with AtRIN4<sup>E156A</sup> (Figure  
356 4G, white circle) while the corresponding HR was still detected with AtRIN4<sup>E15A</sup> (Figure 4G,  
357 red circles). Consistent with the earlier observation (Figure 1B), slower migration of ADP-  
358 ribosylated AtRIN4 during electrophoresis was detected in AtRIN4<sup>E15A</sup> or AtRIN4<sup>WT</sup>, but not  
359 in AtRIN4<sup>E156A</sup> or AtRIN4<sup>E15AE156A</sup> (Figure 4F).



360

361 **Conserved glutamate residues in GmRIN4c and GmRIN4d are ADP-ribosylated by**  
362 **AvrRpm2<sub>Psa</sub>**

363 There are four soybean RIN4 homologs (Figure 5A). When co-expressed with AvrRpm1<sub>Pma</sub>  
364 in *N. benthamiana* via Agrobacterium, GmRIN4a and GmRIN4b were shown to be ADP-  
365 ribosylated while GmRIN4c or GmRIN4d were not modified (Redditt et al., 2019). In stark  
366 contrast, we found that GmRIN4c and GmRIN4d were ADP-ribosylated by Pto DC3000Q<sup>-</sup>  
367 (AvrRpm2<sub>Psa</sub>) while GmRIN4a and GmRIN4b were not modified (Figure 5B). Accordingly,  
368 when the GmRIN4 homologs were co-expressed with AvrRpm2<sub>Psa</sub> and RPM1 in *N.*  
369 *benthamiana* via Agrobacterium, only GmRIN4c and GmRIN4d activated RPM1 (Figure 5C).  
370 The two homologs GmRIN4c and GmRIN4d have glutamate (E) residues at their respective  
371 positions corresponding to the E156 of AtRIN4. In contrast, GmRIN4a and GmRIN4b have  
372 valine (V) at these positions. Similarly, among the two RIN4 homologs of snap bean,  
373 PvRIN4b has the glutamate at the position corresponding to the E156 of AtRIN4 while  
374 PvRIN4a has valine at that position (Figure 3C). PvRIN4b was ADP-ribosylated with the  
375 infection of Pto DC3000Q<sup>-</sup>(AvrRpm2<sub>Psa</sub>) (Figure 3E) and also activated RPM1 when co-  
376 expressed with AvrRpm2<sub>Psa</sub> and RPM1 in *N. benthamiana* (Figure 3F). In contrast, PvRIN4a  
377 was not modified by Pto DC3000Q<sup>-</sup>(AvrRpm2<sub>Psa</sub>) and no corresponding HR was detected  
378 when co-expressed with AvrRpm2<sub>Psa</sub> and RPM1 in *N. benthamiana* via Agrobacterium.  
379 Therefore, the allelic variations in the critical residue within the C-NOI domains of soybean  
380 and snap bean RIN4 homologs were reflected in the differential ADP-ribosylation patterns by  
381 AvrRpm2<sub>Psa</sub>, suggesting the conserved glutamate residues at the corresponding positions of  
382 the E156 of AtRIN4 are the likely target sites in these RIN4 homologs. Interestingly, the  
383 alternative residue valine is also found at the positions corresponding to E156 in other  
384 Arabidopsis NOI domain-containing proteins (Redditt et al., 2019).

385 To further study the functional significance of the glutamate residues in the two GmRIN4  
386 homologs at the corresponding positions of E156 in AtRIN4 (E189 in GmRIN4c and E180  
387 GmRIN4d, respectively), substitutions were made to create GmRIN4c<sup>E189A</sup> and  
388 GmRIN4d<sup>E180A</sup>. Proteins were extracted from *N. benthamiana* leaves expressing  
389 GmRIN4c<sup>E189A</sup> or GmRIN4d<sup>E180A</sup> via Agrobacterium after infection with Pto DC3000Q<sup>-</sup>  
390 (AvrRpm2<sub>Psa</sub>). Western blot analysis showed that GmRIN4c<sup>E189A</sup> was not ADP-ribosylated,  
391 demonstrating the replaced glutamate (E189) was the only target site for AvrRpm2<sub>Psa</sub> in

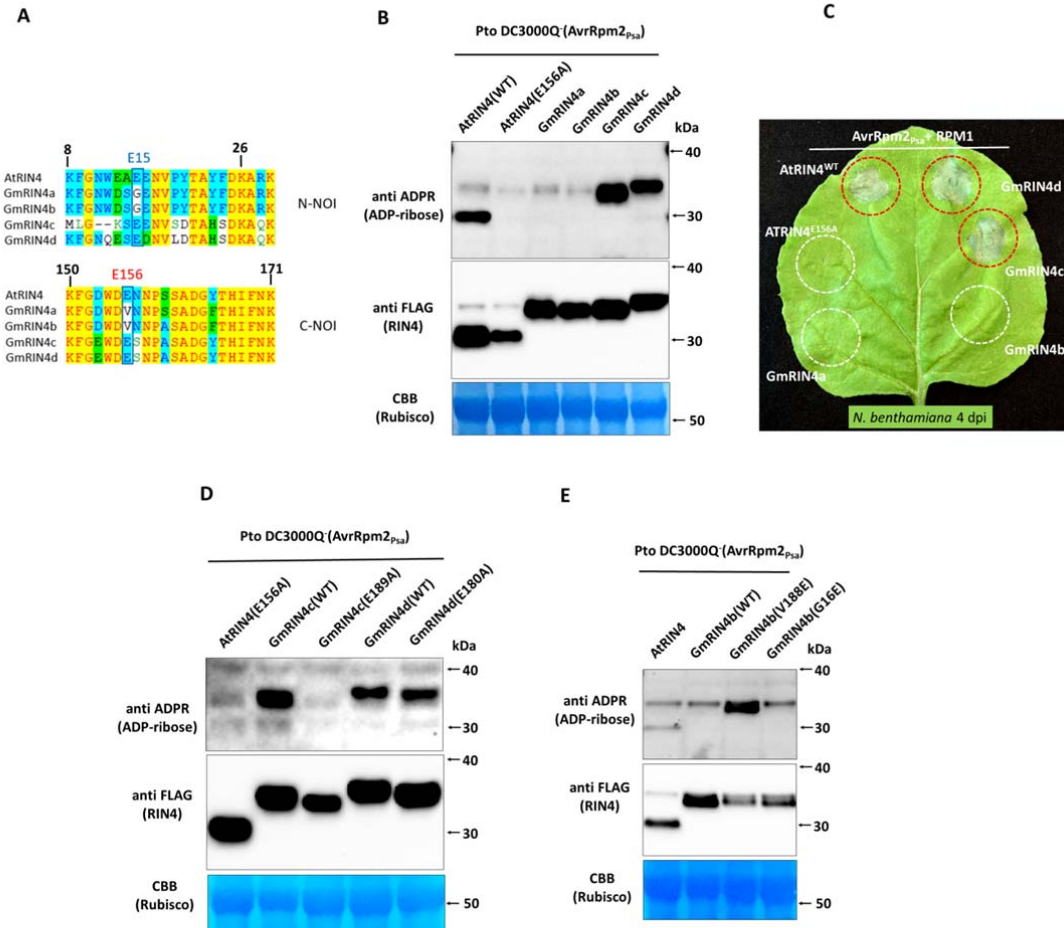

**Figure 5.** Western blot analysis of soybean RIN4 homologs from *N. benthamiana* leaves infected with Pto DC3000Q (AvrRpm2<sub>P<sub>3a</sub></sub>). **A.** Sequence alignment of the nitrate-induced (NOI) sequences in RIN4 homologs of Arabidopsis (AtrIN4) and soybean (GmRIN4a, GmRIN4b, GmRIN4c, and GmRIN4d). E156 in AtrIN4 corresponds to E189 in GmRIN4c or E180 in GmRIN4d, respectively. GmRIN4a and GmRIN4b have a valine (V) at the corresponding positions. **B.** Western blot analysis of soybean RIN4 homologs after infection with Pto DC3000Q (AvrRpm2<sub>P<sub>3a</sub></sub>). Proteins were extracted from *N. benthamiana* leaves 1 d post infiltration of Pto DC3000Q (AvrRpm2<sub>P<sub>3a</sub></sub>) following Agrobacterium infiltration 2 d earlier for transient expression RIN4 homologs. **C.** Soybean RIN4 homologs were co-expressed with AvrRpm2<sub>P<sub>3a</sub></sub> and RPM1 in *N. benthamiana* via Agrobacterium to assess the RPM1-mediated HR. The visual image was taken in 4 d post Agrobacterium infiltration. Red circles denote HR and white circles denote no HR. **D.** Western blot analysis of GmRIN4c<sup>E189A</sup> and GmRIN4d<sup>E180A</sup> from *N. benthamiana* leaves infected with Pto DC3000Q (AvrRpm2<sub>P<sub>3a</sub></sub>). Proteins extraction and Western blot analysis were performed as in (B). **E.** Western blot analysis of GmRIN4b<sup>V188E</sup> and GmRIN4b<sup>G18E</sup> from *N. benthamiana* leaves infected with Pto DC3000Q (AvrRpm2<sub>P<sub>3a</sub></sub>). Proteins extraction and Western blot analysis were performed as in (B).

392 GmRIN4c (Figure 5D). In contrast, GmRIN4d<sup>E180A</sup> was still ADP-ribosylated even though  
 393 the modification of the probable target site was blocked by the substitution (E180A). The  
 394 ADP-ribosylated GmRIN4d<sup>E180A</sup> consistently migrated faster than the ADP-ribosylated  
 395 GmRIN4d<sup>WT</sup> during electrophoresis (Figure 5D), suggesting potential differences in structure  
 396 among RIN4 proteins modified at different sites. Unlike GmRIN4c, which has only one  
 397 target site (E189), GmRIN4d appears to have other residue(s) that can be ADP-ribosylated  
 398 when E180 is absent.

399 Apart from the position corresponding to E156 of AtRIN4 in the C-NOI domain, GmRIN4  
400 homologs have another polymorphic site in the corresponding N-NOI domain at the position  
401 corresponding to E15 of AtRIN4 (Figure 5A). The soybean RIN4 homologs GmRIN4a and  
402 GmRIN4b have substitutions at these two positions when compared with AtRIN4 or the other  
403 two GmRIN4 homologs (Figure 5A). To further investigate the participation of these two  
404 glutamates in the ADP-ribosylation, we created GmRIN4b<sup>V188E</sup> and GmRIN4b<sup>G16E</sup> by  
405 instating glutamate residues at the positions corresponding to E156 or E15 of AtRIN4,  
406 respectively. Proteins were extracted from *N. benthamiana* leaves transiently expressing the  
407 modified GmRIN4b proteins after infection with Pto DC3000Q<sup>-</sup>(AvrRpm2<sub>Psa</sub>). Western blot  
408 analysis showed that GmRIN4b<sup>V188E</sup> became efficiently ADP-ribosylated with a substituted  
409 glutamate at the site corresponding to E156 of AtRIN4, while the GmRIN4b<sup>G16E</sup> with a  
410 substituted glutamate corresponding to E15 of AtRIN4 was not modified (Figure 5E).  
411 Therefore, the absence of the conserved glutamate residue corresponding to E156 of AtRIN4  
412 is likely responsible for the lack of ADP-ribosylation in GmRIN4b by the bacterial effector  
413 AvrRpm2<sub>Psa</sub>.

414

#### 415 **A conserved glutamate of MdrIN4-2 is ADP-ribosylated by AvrRpm2<sub>Psa</sub> and the N-NOI** 416 **domain plays a role in HR**

417 There are two RIN4 homologs in apple species. In contrast to GmRIN4 homologs, both  
418 MdrIN4 homologs have glutamates in the positions corresponding to the E156 of AtRIN4  
419 (E186 in MdrIN4-2 and E184 in MdrIN4-1, Figure 6A). To see whether the E186 in  
420 MdrIN4-2 is also the target of AvrRpm2<sub>Psa</sub>, we created MdrIN4-2<sup>E186A</sup> to block the  
421 modification at this site. Proteins were extracted from *N. benthamiana* leaves transiently  
422 expressing MdrIN4-2<sup>E186A</sup> via Agrobacterium after infection with Pto DC3000Q<sup>-</sup>  
423 (AvrRpm2<sub>Psa</sub>). Similar to AtRIN4<sup>E156A</sup>, Western blot analysis showed that MdrIN4-2<sup>E186A</sup>  
424 was not ADP-ribosylated (Figure 6B, left), suggesting that E186 is the likely target of  
425 AvrRpm2<sub>Psa</sub>. When MdrIN4-2<sup>E186A</sup> was co-expressed with AvrRpm2<sub>Psa</sub> and RPM1 in *N.*  
426 *benthamiana* via Agrobacterium, no significant HR was found compared with the wild type  
427 MdrIN4-2<sup>WT</sup> (Figure 6B, right).

428 Because the C-NOI domains of the two apple RIN4 homologs are identical, two amino acids  
429 15D and 16Q in the N-NOI domain of MdrIN4-1 are the only different residues in the two

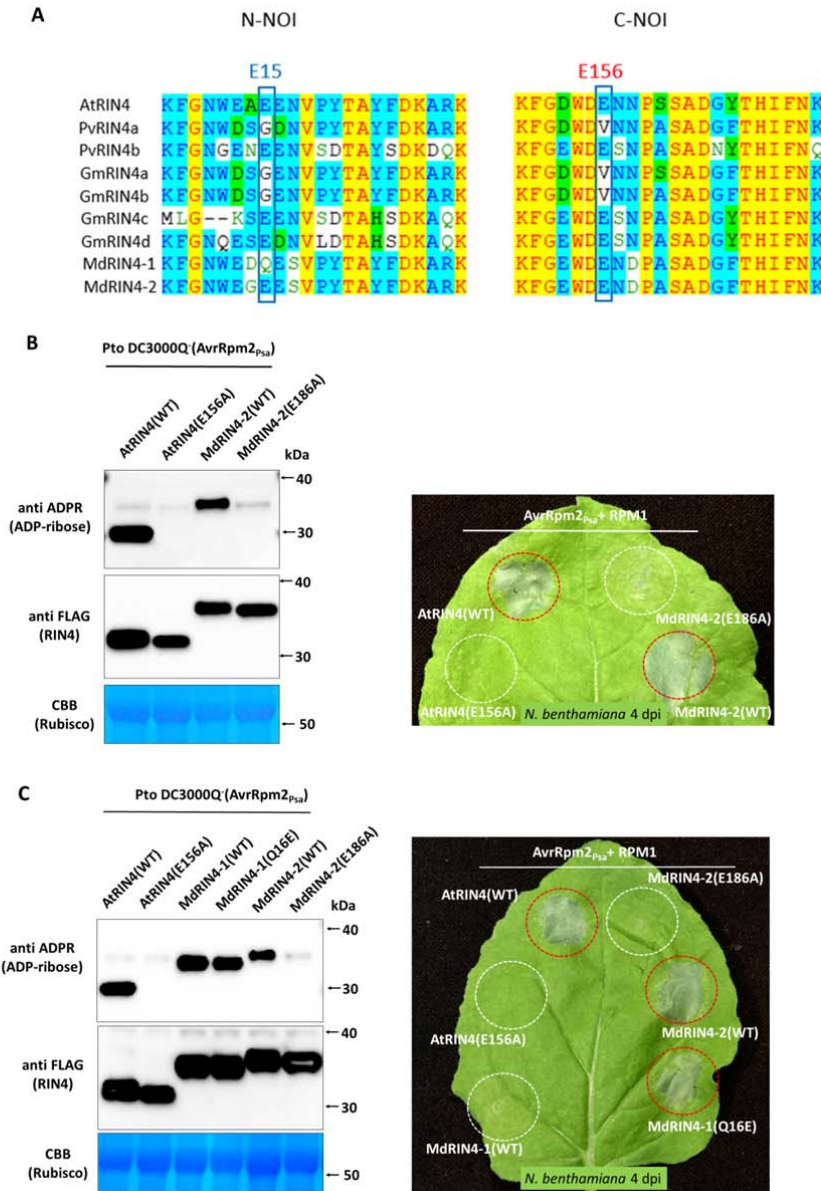

**Figure 6.** Western blot analysis and RPM1-mediated HR assay of apple RIN4 homologs. **A.** Sequence alignment of the NOI sequences in the RIN4 homologs of Arabidopsis (AtRIN4), snap bean (PvRIN4a and PvRIN4b), soybean (GmRIN4a to GmRIN4d), and apple (MdRIN4-1 and MdRIN4-2). Both apple RIN4 loci have glutamate residues at the positions (E186 in MdRIN4-2 and E184 in MdRIN4-1) corresponding to E156 of AtRIN4. MdRIN4-2 also has a glutamate (E16) at the position corresponding to E15 of AtRIN4, while MdRIN4-1 has an alternative residue glutamine (Q16). **B.** Western blot analysis of MdRIN4-2<sup>E186A</sup> (left). Proteins were extracted 1 d post infection of Pto DC3000Q (AvrRpm2<sub>Psa</sub>) into *N. benthamiana* leaves that had been pre-infiltrated with *Agrobacterium* 2 d earlier for transient expression of RIN4 homologs. Apple RIN4 homologs were co-expressed with AvrRpm2<sub>Psa</sub> and RPM1 in *N. benthamiana* via *Agrobacterium* to assess the RPM1-mediated HR (right). **C.** Western blot analysis of MdRIN4-1<sup>Q16E</sup> with other RIN4 homologs (left). Protein extractions and Western blot analysis were performed as in (B). MdRIN4-1<sup>Q16E</sup> and other RIN4 homologs were co-expressed with AvrRpm2<sub>Psa</sub> and RPM1 via *Agrobacterium* in different areas of an *N. benthamiana* leaf to assess the RPM1-mediated HR.

430 NOI sequences when compared with MdRIN4-2. In particular, MdRIN4-2 has a glutamate  
 431 (E16) in the N-NOI domain at the position corresponding to E15 in AtRIN4, while MdRIN4-  
 432 1 has glutamine (Q16) at the corresponding position (Figure 6A). Both homologs were ADP-  
 433 ribosylated by Pto DC3000Q (AvrRpm2<sub>Psa</sub>) as expected (Figure 6C, left). However, when co-  
 434 expressed with AvrRpm2<sub>Psa</sub> and AtRIN4 in *N. benthamiana* via *Agrobacterium*, MdRIN4-1

435 did not trigger the RPM1-mediated HR, suggesting that the ADP-ribosylation of MdRIN4-1  
436 by AvrRpm2<sub>Psa</sub> may not be recognised by RPM1 (Figure 6C, right). We created MdRIN4-  
437 1<sup>Q16E</sup> to substitute a glutamate in place of Q16 and tested whether the glutamate at this  
438 position would affect the activity. Proteins were extracted from *N. benthamiana* leaves after  
439 infection with Pto DC3000Q<sup>-</sup>(AvrRpm2<sub>Psa</sub>) following transient expression of MdRIN4-1<sup>Q16E</sup>  
440 via *Agrobacterium*. Western blot analysis showed no significant changes in ADP-ribosylation  
441 or protein accumulation of MdRIN4-1<sup>Q16E</sup> compared with the wild type MdRIN4-1<sup>WT</sup> (Figure  
442 6C, left). However, when MdRIN4-1<sup>Q16E</sup> was co-expressed with RPM1 and AvrRpm2<sub>Psa</sub> in *N.*  
443 *benthamiana* via *Agrobacterium*, an RPM1-mediated HR was observed (Figure 5C, right).  
444 The substitution of the glutamate in MdRIN4-1<sup>Q16E</sup> at the position corresponding to E15 of  
445 AtRIN4 resulted in an activation of RPM1, comparable with that of MdRIN4-2. Therefore,  
446 even though E16 in MdRIN4-2 (and also in MdRIN4-1<sup>Q16E</sup>) is not modified by AvrRpm2<sub>Psa</sub>,  
447 the glutamate residue appears to be also important in activating RPM1. It is interesting to note  
448 that apple species also have MdRIN4-1, which is ADP-ribosylated but does not activate  
449 RPM1, in addition to the functional MdRIN4-2, which is ADP-ribosylated and activates  
450 RPM1. It is possible that the ADP-ribosylation in MdRIN4-1 may be specifically recognised  
451 by an apple resistance protein. Alternatively, the host may express a less sensitive RIN4 as  
452 well as the fully functional RIN4 to reduce the cost of defence by attenuating unnecessary  
453 responses.

454

#### 455 **ADP-ribosylation of RIN4 may not be directly linked to phosphorylation**

456 Another effector AvrB from *Pseudomonas syringae* pv. *glycinea* is known to trigger RPM1  
457 activation by inducing phosphorylation at T166 of AtRIN4 (Chung et al., 2011; Lee et al.,  
458 2015a). The enzymatic activity of AvrB is not known but the phosphorylation of RIN4 is  
459 thought to be mediated by plant kinases such as RIPK (Liu et al., 2011). A previous *in vitro*  
460 experiment combined with mass spectrometry analysis suggested that RIPK may have three  
461 target residues (T21, S160, and T166) in AtRIN4 (Liu et al., 2011). In particular, the  
462 phosphorylation of T166 was proposed as a key physiological switch for defence (Chung et  
463 al., 2014). Two other bacterial effectors AvrRpm1<sub>Pma</sub> and AvrRpm2<sub>Psa</sub> also trigger the  
464 activation of RPM1. In particular, AvrRpm2<sub>Psa</sub> activates RPM1 by directly ADP-ribosylating  
465 E156 of AtRIN4 (Figure 4F and 4G). Therefore, we investigated the impact of the ADP-

466 ribosylation of E156 on the phosphorylation at T166, and *vice versa*, in the RPM1-mediated  
467 HR in *N. benthamiana*.

468 Proteins were extracted from *N. benthamiana* leaves transiently co-expressing RIN4  
469 homologs of Arabidopsis and soybean with AvrB via Agrobacterium. Western blot analysis  
470 showed that the RIN4 proteins were not ADP-ribosylated, suggesting that AvrB does not  
471 function as an ADP-ribosyl transferase to modify RIN4 (Figure 7A). When the triple mutant  
472 AtRIN4<sup>T21AS160AT166A</sup>, in which the potential phosphorylation sites were blocked, was co-  
473 expressed with AvrB and RPM1 in *N. benthamiana* via Agrobacterium, there was a  
474 significant reduction in the HR compared with AtRIN4<sup>WT</sup> (Figure 7B, white circle in the right  
475 half of the leaf), showing that the AvrB-triggered RPM1 activation depends on these replaced  
476 residues as previously reported (Chung et al., 2011). In contrast, when the ADP-ribosylation-  
477 deficient allele AtRIN4<sup>E156A</sup> was co-expressed with AvrB and RPM1, no significant  
478 difference was found in the HR compared with the wild type AtRIN4<sup>WT</sup> (Figure 7B, right half  
479 of the leaf). The absence of the ADP-ribosylation site (E156) in AtRIN4<sup>E156A</sup> had no impact  
480 on the AvrB-triggered activation of RPM1. Therefore the AvrB-triggered, phosphorylation-  
481 dependent, activation of RPM1 appears not to depend on the ADP-ribosylation of E156 in  
482 AtRIN4.

483 In turn, when the phosphorylation-deficient mutant AtRIN4<sup>T21AS160AT166A</sup> was co-expressed  
484 with AvrRpm2<sub>Psa</sub> and RPM1 in *N. benthamiana* via Agrobacterium, again there was no  
485 significant difference in the RPM1-mediated HR compared with the wild type AtRIN4<sup>WT</sup>,  
486 while AtRIN4<sup>E156A</sup> resulted in no host response (Figure 7B, left half of the leaf). Therefore,  
487 the AvrRpm2<sub>Psa</sub>-triggered, ADP-ribosylation-dependent, activation of RPM1 appears not to  
488 rely on the phosphorylation of those modified sites, including T166. We also tested AtRIN4  
489 alleles with substitutions at the phosphorylation sites in different combinations (AtRIN4<sup>T21A</sup>,  
490 AtRIN4<sup>T166A</sup>, AtRIN4<sup>T21AT166A</sup>, and AtRIN4<sup>T21AS160AT166A</sup>) with infection of Pto DC3000Q<sup>-</sup>  
491 (AvrRpm2<sub>Psa</sub>) instead of Agrobacterium-mediated transient expression. Western blot analysis  
492 showed no significant differences in ADP-ribosylation between AtRIN4<sup>WT</sup>, AtRIN4<sup>T21A</sup>,  
493 AtRIN4<sup>T166A</sup>, AtRIN4<sup>T21AT166A</sup>, or AtRIN4<sup>T21AS160AT166A</sup>, while AtRIN4<sup>E156A</sup> showed no ADP-  
494 ribosylation (Figure 7C, left). Accordingly, when the RIN4 alleles were co-expressed with  
495 AvrRpm2<sub>Psa</sub> and RPM1 in *N. benthamiana* via Agrobacterium, all resulted in comparable  
496 host responses except AtRIN4<sup>E156A</sup> (Figure 7C, right).

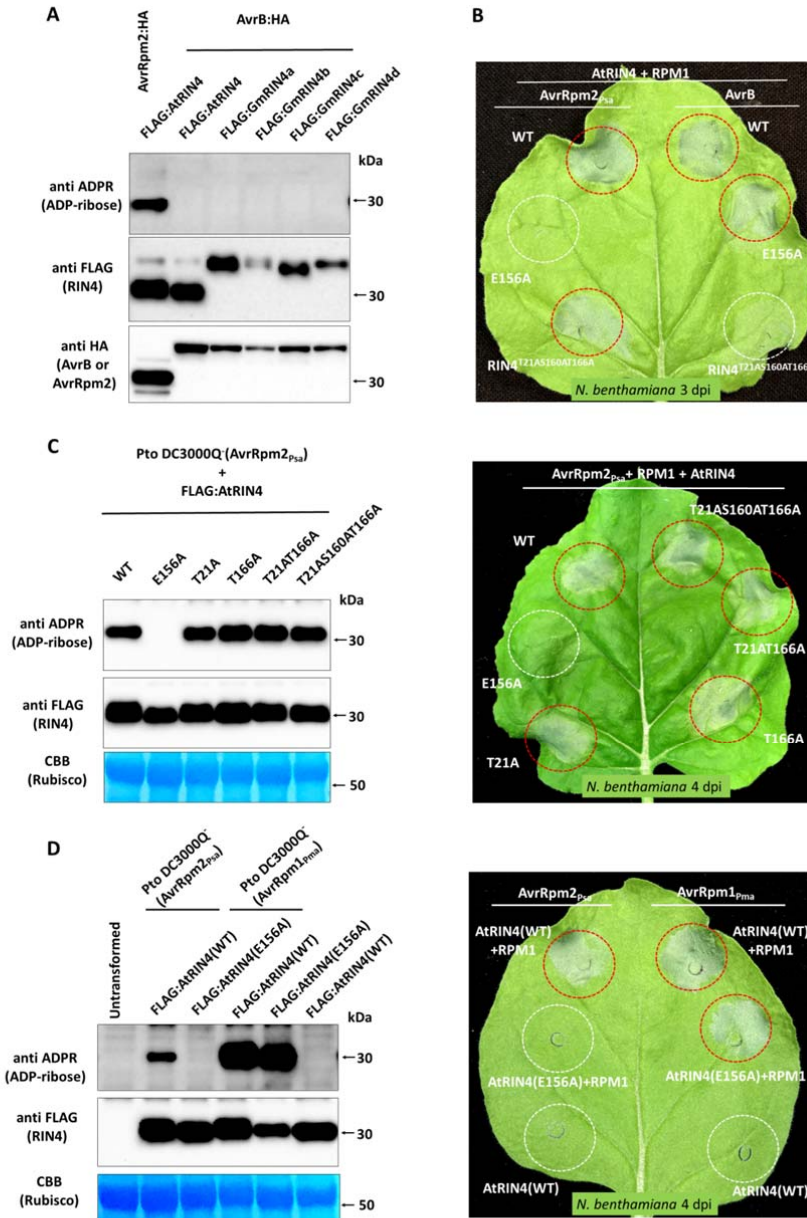

**Figure 7.** Activities of the type three effectors (T3Es) triggering RPM1 activation. **A.** Western blot analysis of RIN4 homologs of Arabidopsis (AtRIN4) and soybean (GmRIN4a to GmRIN4d) co-expressed in *N. benthamiana* via Agrobacterium. Proteins were extracted from *N. benthamiana* leaves co-expressing AvrB with RIN4 via Agrobacterium at 2 d post infiltration. **B.** Different AtRIN4 alleles (AtRIN4<sup>WT</sup>, AtRIN4<sup>E156A</sup> or AtRIN4<sup>T21AS160AT166A</sup>) and RPM1 were co-expressed with either AvrRpm2<sub>Psa</sub> (left half) or AvrB (right half) on an *N. benthamiana* leaf via Agrobacterium to assess the corresponding RPM1-mediated HR. **C.** Western blot analysis of different AtRIN4 alleles (AtRIN4<sup>WT</sup>, AtRIN4<sup>E156A</sup>, AtRIN4<sup>T21A</sup>, AtRIN4<sup>T166A</sup>, AtRIN4<sup>T21AT166A</sup>, and AtRIN4<sup>T21AS160AT166A</sup>) from *N. benthamiana* leaves infected with Pto DC3000Q (AvrRpm2<sub>Psa</sub>) (left). Proteins were extracted 1 d post infection of Pto DC3000Q (AvrRpm2<sub>Psa</sub>) into *N. benthamiana* leaves pre-infiltrated with Agrobacterium 2 d earlier for transient expression of the RIN4 alleles. The AtRIN4 alleles were co-expressed with AvrRpm2<sub>Psa</sub> and RPM1 on different areas of an *N. benthamiana* leaf via Agrobacterium (right). **D.** Western blot analysis of AtRIN4<sup>E156A</sup> from *N. benthamiana* leaves infected with either Pto DC3000Q (AvrRpm2<sub>Psa</sub>) or by Pto DC3000Q (AvrRpm1<sub>Pma</sub>) (left). AtRIN4<sup>E156A</sup> and RPM1 were co-expressed with either AvrRpm2<sub>Psa</sub> or AvrRpm1<sub>Pma</sub> on different areas of an *N. benthamiana* leaf to assess the RPM1-mediated HR (right). Red circles denote HR and white circles denote no HR.

497 Even though the two posttranslational modifications, ADP-ribosylation and phosphorylation,  
 498 of RIN4 are closely linked to the activation of RPM1, they may not be equivalent  
 499 physiologically as well as biochemically. Because a secreted bacterial effector directly  
 500 modifies the host protein, ADP-ribosylation of RIN4 by AvrRpm2<sub>Psa</sub> may be one of the

501 pathogen's virulence activities. In contrast, the phosphorylation of RIN4 by host kinases is  
502 more likely to be a part of defence mechanism responding to a bacterial protein. RPM1 may  
503 be independently activated either by the direct ADP-ribosylation of E156 or by the  
504 phosphorylation of T166 so long as either modification is recognised by the resistance protein,  
505 which is physically associated in the RIN4 multi-protein complex. To our current knowledge,  
506 there is no known biochemical activity of AvrB apart from a strong affinity to RIN4.  
507 Therefore, AvrB may induce phosphorylation of RIN4 by changing the interactions between  
508 proteins, including RIPK and RPM1 in Arabidopsis, in the RIN4 complex. In contrast,  
509 AvrRpm2<sub>Psa</sub> directly modifies RIN4 to generate a distinct structural change, which may affect  
510 other physically associated proteins in the multi-protein complex including RPM1 in  
511 Arabidopsis.

512 Apart from the RPM1 activation, we have little knowledge about the physiological  
513 significance of the structural change introduced in the RIN4 complex by AvrRpm2<sub>Psa</sub>. It  
514 would be interesting to see whether the ADP-ribosylation of RIN4 would affect the activities  
515 of other proteins in the RIN4 complex. Interestingly, AvrRpm2<sub>Psa</sub> also physically associates  
516 with RIN4 (Figure 2A), therefore it is possible that the bacterial protein has the ability to  
517 change protein-protein interactions in the RIN4 multi-protein complex even without  
518 modifying RIN4.

519

## 520 **AvrRpm2<sub>Psa</sub> and AvrRpm1<sub>Pma</sub> have distinct properties**

521 The bacterial effector AvrRpm1<sub>Pma</sub> also functions as an ADP-ribosyl transferase to modify  
522 RIN4, leading to the activation of RPM1 (Redditt et al., 2019). To compare the activities of  
523 AvrRpm1<sub>Pma</sub> and AvrRpm2<sub>Psa</sub>, we tested AvrRpm1<sub>Pma</sub> in combination with AtRIN4<sup>E156A</sup>,  
524 which cannot be ADP-ribosylated by AvrRpm2<sub>Psa</sub>. When proteins were extracted from *N.*  
525 *benthamiana* leaves infected with Pto DC3000Q(AvrRpm1<sub>Pma</sub>) following transient  
526 expression of AtRIN4<sup>E156A</sup> via Agrobacterium, Western blot analysis showed that  
527 AtRIN4<sup>E156A</sup> was still ADP-ribosylated, demonstrating that another residue was modified by  
528 AvrRpm1<sub>Pma</sub> (Figure 7D, left). When AvrRpm1<sub>Pma</sub> was co-expressed with AtRIN4<sup>E156A</sup> and  
529 RPM1 in *N. benthamiana* via Agrobacterium, the corresponding RPM1-mediated HR was  
530 detected, while no comparable HR was found with AvrRpm2<sub>Psa</sub> (Figure 7D, right).  
531 AvrRpm1<sub>Pma</sub> and AvrRpm2<sub>Psa</sub> also showed completely different activities when tested with



532 GmRIN4 homologs (Figure 5B and Figure S4). Therefore, the activities of these two effectors  
533 are not biochemically identical. AvrRpm1<sub>Pma</sub> and AvrRpm2<sub>Psa</sub> are the only two ADP-ribosyl  
534 transferases (ARTs) from bacterial plant pathogens so far characterised. However, sequence  
535 comparisons suggest that ARTs may be widely-distributed among phytopathogens colonising  
536 various plant hosts. RPM1 is an Arabidopsis protein and no close homologs are found in most  
537 other non-Brassicaceae plant species. Considering most plant species express RIN4 homologs  
538 and bacterial ARTs are found in non-Arabidopsis pathogens such as Psa (McCann et al., 2013;  
539 Fujikawa and Sawada, 2016; McCann et al., 2017), this posttranslational modification is  
540 likely to have other functional significance apart from the RPM1-mediated host response.

541

#### 542 **AvrRpm2<sub>Psa</sub> alleles have differential characteristics in activity and affinity**

543 Based on genetic diversity and toxin production, Psa has been categorized into biovars (bv)  
544 (Fujikawa and Sawada, 2016, 2019). Recently bv4 has been transferred to another  
545 pathovar, *Pseudomonas syringae* pv. *actinidifoliorum* (Abelleira et al., 2015) and Psa is  
546 composed of five bvs currently. Apart from the recently added bv6, all other bvs have  
547 AvrRpm2<sub>Psa</sub> loci. The AvrRpm2<sub>Psa</sub> alleles in bv1 and bv3 have frameshift mutations, leading  
548 to premature termination of the corresponding proteins (Figure 8A). In addition to the  
549 frameshift mutations, the AvrRpm2<sub>Psa</sub> alleles in bv1 and bv3 also have two other independent  
550 substitutions when compared with the functional allele in bv5 (AvrRpm2<sub>Psa</sub><sup>bv5</sup> or simply  
551 AvrRpm2<sub>Psa</sub>). We corrected the frameshifts in the bv1 and bv3 alleles by removing extra  
552 nucleotides to express the corresponding full length AvrRpm2<sub>Psa</sub> proteins. Western blot  
553 analysis showed that the edited proteins are expressed in full length (AvrRpm2<sub>Psa</sub><sup>bv1(in-frame)</sup>  
554 and AvrRpm2<sub>Psa</sub><sup>bv3(in-frame)</sup>) in *N. benthamiana* (Figure 8B, anti HA in Input panel). However,  
555 when the edited proteins were co-expressed with AtRIN4, neither AvrRpm2<sub>Psa</sub><sup>bv1(in-frame)</sup> nor  
556 AvrRpm2<sub>Psa</sub><sup>bv3(in-frame)</sup> modified AtRIN4 (Figure 8B, anti ADPR in Input panel). The  
557 frameshift mutations in the bv1 and bv3 alleles are likely to be chronologically the last  
558 mutations in these alleles because non-functional genes would only accumulate random  
559 mutations. Therefore, the AvrRpm2<sub>Psa</sub> effectors in bv1 and bv3 appear to have lost their  
560 activity to modify RIN4 even before the frameshift mutations were selected.

561 Co-IP analysis with AtRIN4 showed that AvrRpm2<sub>Psa</sub> proteins from different bvs physically  
562 associate with AtRIN4 with differential affinities (Figure 8B, Co-IP panel). In particular, the

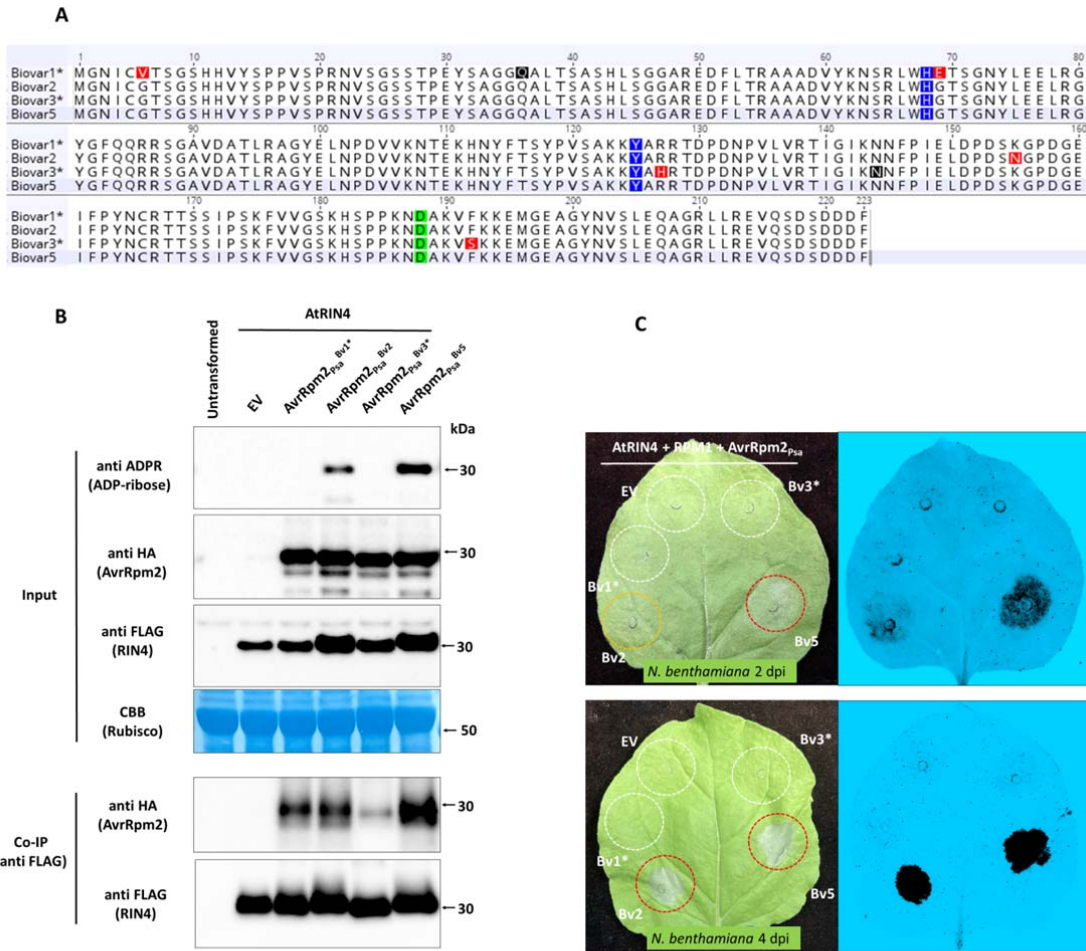

**Figure 8.** Activity and physical association of AvrRpm2<sub>Psa</sub> alleles. **A.** Sequence alignment of AvrRpm2<sub>Psa</sub> alleles from different Psa biovars. The biovar1 and biovar3 alleles were edited to express corresponding full-length proteins by removing extra nucleotides. The corrected sites are marked in black. The two residues H68 and Y125 are marked in blue and D188 is in green. All other substitutions are marked in red. **B.** Western blot analysis of AtrIN4 co-expressed with different AvrRpm2<sub>Psa</sub> alleles (input panel). Proteins were extracted 2 d after co-infiltration of AtrIN4 and AvrRpm2<sub>Psa</sub> in *N. benthamiana* via Agrobacterium. Co-IP of AtrIN4 with different AvrRpm2<sub>Psa</sub> proteins (Co-IP panel). Proteins were immunoprecipitated using anti FLAG magnetic beads to isolate AtrIN4. The precipitated proteins were probed using corresponding antibodies. **C.** AvrRpm2<sub>Psa</sub> alleles from different Psa biovars were co-expressed with AtrIN4 and RPM1 via Agrobacterium on different areas of an *N. benthamiana* leaf to assess the RPM1-mediated HR. Red circles denote HR, white circles denote no HR, and orange circle denotes reduced HR. Visual inspection (left) and fluorescence detection monitored in the ChemiDoc™ system (right) were shown.

563 physical association of AtrIN4 with AvrRpm2<sub>Psa</sub><sup>bv3(in-frame)</sup> was significantly lower when  
 564 compared with AvrRpm2<sub>Psa</sub><sup>bv5</sup>. The two other substitutions in AvrRpm2<sub>Psa</sub><sup>bv3(in-frame)</sup> are  
 565 R127H and F192S, close to residues Y125 and D188, respectively, which correspond to the  
 566 two residues in the conserved H-Y-D motif in AvrRpm1<sub>Pma</sub> (Cherkis et al., 2012). Earlier we  
 567 found that AvrRpm2<sub>Psa</sub><sup>Y125A</sup> lost its catalytic activity while AvrRpm2<sub>Psa</sub><sup>D188A</sup> lost the ability  
 568 for physical association with RIN4 (Figure 2C). Therefore the current AvrRpm2<sub>Psa</sub><sup>bv3</sup> allele  
 569 may have undergone multiple selections to change its ability to affect the RIN4 protein  
 570 complex (either by ADP-ribosylation of RIN4 or by changing physical association with  
 571 RIN4). Similarly, the bv1 allele (AvrRpm2<sub>Psa</sub><sup>bv1</sup>) has two other substitutions in addition to the

572 frameshift mutation when compared with the functional AvrRpm2<sub>Psa</sub><sup>bv5</sup>. One substitution is  
573 G69E, which is next to H68, another residue in the H-Y-D motif. The other substitution in the  
574 AvrRpm2<sub>Psa</sub><sup>bv1</sup> is G6V. Glycine residues located near N-termini of bacterial effectors are  
575 often involved in localisation of the bacterial proteins to membranes and this substitution may  
576 have changed the localisation of the bacterial effector in the host.

577 The main activities of AvrRpm2<sub>Psa</sub><sup>bv1(in-frame)</sup> or AvrRpm2<sub>Psa</sub><sup>bv3(in-frame)</sup> may not have been the  
578 ADP-ribosylation of RIN4. Otherwise, additional frameshift mutations would not have been  
579 selected for these loci, which presumably had lost the activities already. AvrRpm2<sub>Psa</sub><sup>bv1(in-frame)</sup>  
580 may be able to affect the structure of the RIN4 multi-protein complex with a reduced affinity  
581 to RIN4 (Figure 8B, CoIP) even though it does not modify RIN4. In contrast,  
582 AvrRpm2<sub>Psa</sub><sup>bv3(in-frame)</sup> binds to RIN4 significantly weakly, suggesting that this bacterial  
583 protein may affect the RIN4 complex neither by direct modification of RIN4 nor by the  
584 physical association with RIN4. It is also possible that AvrRpm2<sub>Psa</sub><sup>bv3(in-frame)</sup> may have  
585 differential affinities for different RIN4 homologs, specifically affecting protein-protein  
586 interactions in different RIN4 complexes without modifying RIN4. Alternatively, considering  
587 another bacterial ADP-ribosyl transferase AvrRpm1<sub>Pma</sub> specifically modified at least ten  
588 other Arabidopsis proteins containing NOI domains (Redditt et al., 2019), AvrRpm2<sub>Psa</sub><sup>bv1(in-  
589 frame)</sup> and AvrRpm2<sub>Psa</sub><sup>bv3(in-frame)</sup> may have performed other virulence functions, which were  
590 phased out by multiple selections, by targeting other proteins.

591 The allelic variations in the AvrRpm2<sub>Psa</sub> loci among bv1, bv3, and bv5 demonstrate the  
592 importance of the residues around the H-Y-D motif. In contrast, the allele from bv2  
593 (AvrRpm2<sub>Psa</sub><sup>bv2</sup>) is catalytically functional with a single substitution (K155N) when  
594 compared with AvrRpm2<sub>Psa</sub><sup>bv5</sup> (Figure 8B and Figure 8C). When co-expressed with RPM1  
595 and AtRIN4 in *N. benthamiana* via Agrobacterium, this allele triggered significantly weaker  
596 (or slower) HR compared with AvrRpm2<sub>Psa</sub><sup>bv5</sup> (Figure 8C, orange circle in 2 dpi). Co-IP  
597 analysis suggests that AvrRpm2<sub>Psa</sub><sup>bv2</sup> physically associates with RIN4 with a reduced affinity  
598 compared with AvrRpm2<sub>Psa</sub><sup>bv5</sup>. The replaced residue N155 is distantly located from the H-Y-  
599 D motif. It appears that the N155K substitution did not result in the complete loss of catalytic  
600 activity (Figure 8B, anti ADPR in Input) nor the ability to physically associate with RIN4  
601 (Figure 8B, anti HA in Co-IP).

602 Lastly, the allelic variations in the AvrRpm2<sub>Psa</sub> loci among modern day Psa biovars suggests  
603 that there have been substantial interactions between the pathogen and the host relating to

604 these loci, raising a strong possibility that the Psa effector AvrRpm2<sub>Psa</sub> is recognised in its  
605 natural host kiwifruit.

606

607

## 608     **METHODS**

### 609     **Plant material, DNA constructs, bacterial strains, and growth conditions**

610     For *Agrobacterium*-mediated transient expression, open reading frames of AvrRpm2<sub>Psa</sub>  
611     alleles were PCR amplified from respective Psa strains using a primer pair including a  
612     reverse primer that contained a HA tag sequence (AR2atgf1 and AR2HAatgar1) listed below.  
613     Amplified fragments were cloned in a binary vector (pART27, pHEX, or pGWB) under the  
614     35S promoter to transform the *Agrobacterium* strain GV3101. The AvrRpm2<sub>Psa</sub> allele cloned  
615     from Psa biovar 5 was used in all experiments unless specified. For Pto infection, a 1.6 Kb  
616     genomic AvrRpm2<sub>Psa</sub> sequence including the *hrpL* box and the linked *ShcF* locus was PCR-  
617     amplified from Psa (biovar 5) using a primer pair gAR2psaf1 and gAR2psar1 (listed below).  
618     The amplified fragment was cloned in the broad-range vector pBBR1MCS5 to transform Pto  
619     DC3000Q<sup>-</sup>, which has been created by deleting the hopQ1 locus (Yoon and Rikkerink, 2020).  
620     Constructs containing the AvrRpm1<sub>Pma</sub> locus were generated from synthesised DNA (a 947  
621     bp EcoRI-EcoRV fragment from *Pseudomonas syringae* pv. *maculicola* plasmid pFKN,  
622     based on the Genbank sequence AF359557) with the set of primers (gAR1f1, AR1atgf1,  
623     AR1taar1, and AR1HAatgar1) listed below. Other related alleles required for transient  
624     expression or infection analyses were either created using the QuickChange Site-directed  
625     Mutagenesis Kit (Agilent Technologies, Santa Clara, CA) or synthesised by Twist Bioscience  
626     (South San Francisco, CA). *Nicotiana benthamiana* plants were grown at 22°C in long-day  
627     conditions (16 h light and 8 h dark) for both *Agrobacterium*-mediated transient expression  
628     and Pto DC3000Q<sup>-</sup> infection assays. *Agrobacterium* was freshly grown in LB with  
629     appropriate antibiotics at 28°C on a shaker. Cells were concentrated by centrifugation at  
630     4000 g for 10 min and resuspended in infiltration buffer (10 mM MgCl<sub>2</sub>,  
631     100 μM acetosyringone). The cells were diluted to the appropriate concentrations (OD<sub>600</sub> =  
632     0.01- 0.08) and infiltrated into leaf tissues of 4- to 5-week-old plants using a needleless  
633     syringe. For the infection experiment, Pto DC3000Q<sup>-</sup> was re-streaked on a solid King's B  
634     media and re-grown at 28°C for 1 d. The freshly grown Pto DC3000Q<sup>-</sup> cells were suspended  
635     in 10 mM MgCl<sub>2</sub> for injection. To detect the cell death response in *N. benthamiana*, the  
636     *Agrobacterium*-infiltrated leaves were visually inspected at 2-5 days post infiltration and/or  
637     the fluorescence of the infiltrated leaves were monitored at 1-2 d post infiltration under the  
638     Pro-Q Emerald 488 in the ChemiDoc™ Gel Imaging System (Bio-Rad, Hercules, CA, USA)  
639     as described previously (Yoon and Rikkerink 2020).

640

641 **Agrobacterium-mediated transient expression and pathogen infection in *N.***

642 ***benthamiana***

643 For all plant transformations, the *Agrobacterium* strain GV3101 was transformed by  
644 electroporation with a binary vector (pART27, pHEX2, or pGWB) containing a specified  
645 construct under the 35S promoter. For transient expression, 4-5 weeks old *N. benthamiana*  
646 leaves were syringe-infiltrated with *Agrobacterium* suspension ( $OD_{600}=0.01$  to 0.08) carrying  
647 the expression construct. A new sequential assay combined the *Agrobacterium*-mediated  
648 transient expression of a host protein with pathogen infection to deliver bacterial effectors  
649 with the T3SS. In such an assay *N. benthamiana* leaves were first infiltrated with  
650 *Agrobacterium*, carrying the specified plant geneexpression construct, which was freshly  
651 grown in LB media and adjusted to  $OD_{600}=0.04$ . Two d post *Agrobacterium* infiltration, the  
652 pre-infiltrated *N. benthamiana* leaves were infected using a needleless syringe with a *Pto*  
653 strain DC3000 without hopQ1 (*Pto* DC3000Q<sup>-</sup>) (Wei et al., 2007) (Yoon and Rikkerink,  
654 2020), carrying the bacterial effector. The *Pto* suspension was derived from freshly grown  
655 *Pto* in King's B media and adjusted to  $OD_{600}=1.0$ . Leaf discs were collected at 15-24 h post  
656 *Pto* infection for protein extraction before leaves collapsed due to the progression of the  
657 infection.

658

659 **Western blot analysis and co-immunoprecipitation**

660 Western blot analysis and co-immunoprecipitation (Co-IP) were performed as previously  
661 described with some modifications (Yoon and Rikkerink, 2020). For immunoblot analysis,  
662 two leaf discs (8 mm diameter) were collected from infiltrated areas of the leaves and placed  
663 in microfuge tubes containing cold 250  $\mu$ L of extraction buffer (2% SDS, 10% glycerol in  
664 PBS). Tissues were homogenised on ice using a micro-pestle and incubated at 90°C for 8  
665 min and centrifuged at 16000 g for 2 min to collect the supernatant. Aliquots were run on a  
666 4–12% SDS-PAGE gradient gel and electrophoresed proteins were transferred to a PDVF  
667 membrane (Immobilon-P, Millipore, Burlington, MA, USA). To facilitate detection, an in  
668 frame C-terminal HA tag was added onto effector sequences (*avrRpm2*<sub>Psa</sub>, *avrRpm1*<sub>Pma</sub> or  
669 *AvrB*) and an in frame N-terminal FLAG tag was added onto RIN4 homolog plant sequences.  
670 Primary antibodies were used at a 1:5000 dilution and an anti-mouse secondary antibody

671 (A9044, Sigma-Aldrich) was used at a 1:10 000 dilution. For Co-IP analyses, Agrobacterium-  
672 infiltrated *N. benthamiana* tissues were collected 2 d post infiltration. A 0.5 g sample of the  
673 collected tissues were ground under liquid nitrogen and suspended in 1 ml of co-IP extraction  
674 buffer (1× PBS, 1% n-dodecyl-β-d-maltoside (Invitrogen, Carlsbad, CA), protease inhibitor  
675 cocktail cOmplete™ (Sigma-Aldrich, St Louis, MO) in NativePAGE™ buffer (Invitrogen)).  
676 Extracted protein samples were centrifuged at 10000 g for 2 min and the supernatant was  
677 collected. After IP using the Dynabeads™ Protein G Immunoprecipitation Kit (1007D,  
678 Invitrogen), Western blots were prepared and probed using HRP-conjugated primary  
679 antibodies in 0.2% I-Block (T2015, Invitrogen). The antibodies used were F1804 (anti-FLAG,  
680 Sigma-Aldrich St Louis, MO, USA), A8592 (anti-FLAG-HRP, Sigma-Aldrich), H9658 (anti-  
681 HA, Sigma-Aldrich), 12013819001 (3F10, anti-HA-HRP, Roche, Basel, Switzerland), and  
682 SAB4700447 (anti-Myc, Sigma-Aldrich) at 1:5000 (v/v) dilutions. To detect ADP-  
683 ribosylated proteins, 1:5000 (v/v) dilution of an anti-ADPR reagent (MABE1016, EMD  
684 Millipore) was used with the anti-rabbit secondary antibody (A0545, Sigma-Aldrich).  
685 Proteins were visualized using the ECL Clarity or the ECL Clarity Max detection systems  
686 (Bio-Rad). The developed Western blots were rinsed with PBS and post-stained with  
687 Coomassie Brilliant Blue (CBB) to visualise protein bands for normalising protein loading.

688

### 689 **Mass Spectrometry analysis**

690 Four to five weeks old *N. benthamiana* leaves were syringe-infiltrated with a mixture of  
691 freshly grown Agrobacterium cultures of FLAG:AtRIN4 and AvrRpm1<sub>Pma</sub> (or AvrRpm2<sub>Psa</sub>)  
692 in equal amounts (OD<sub>600</sub>= 0.2 each) in the infiltration buffer (10 mM MgCl<sub>2</sub>,  
693 100 μM acetosyringone). At 2 d post infiltration, 1 g of infiltrated leaves were ground under  
694 liquid nitrogen to a fine powder. Two mL of extraction buffer (Pearce Co-IP buffer, Thermo-  
695 Fisher) was added to the ground tissues and the resulting suspension was thoroughly mixed.  
696 The suspended mix was left at room temperature for 30 min with agitation and then  
697 centrifuged at 10000 rpm for 2 min to collect the supernatant. A suspension of 100 μL of anti  
698 FLAG-conjugated magnetic beads (Pearce, Thermo-Fisher) was added to the collected  
699 fraction and the mixture was left at room temperature for 30 min with agitation. After this  
700 precipitation, the magnetic beads with immuno-precipitated proteins were collected and  
701 washed four times with PBS. 50 μL of SDS-PAGE sample buffer was added to the washed  
702 magnetic beads with attached proteins and the proteins were extracted from the magnetic

703 beads by heating the mix at 55°C for 12 min. The extracted proteins were run on a 4-12%  
704 SDS-PAGE gradient gel in MOPS running buffer. When the electrophoresis was completed,  
705 the gel was stained with Coomassie Brilliant Blue (CBB) and the visualised RIN4 protein  
706 bands was excised from the gel for mass spectrometry analysis.

707 Gel bands were destained, dehydrated with acetonitrile, and then subjected to reduction with  
708 5 mM dithiothreitol, alkylation with 15 mM iodoacetamide, and digestion with 12.5 ng/μl  
709 modified sequencing grade porcine trypsin (Promega, Madison, WI) at 45°C for 1 hour. The  
710 digest was acidified with formic acid and then injected onto a 0.3×10 mm trap column packed  
711 with Reprosil C18 media (ESI Source Solutions, Woburn, MA) and desalted for 5 minutes at  
712 10 μl/min before being separated on a 0.075 × 200 mm picofrit column (New Objective,  
713 Littleton, MA) packed with 3 μm Reprosil C18 media. The following gradient was applied at  
714 300 nl/min using an Eksigent NanoLC 425 UPLC system (AB SCIEX, Concord, ON): 0 min  
715 5% B; 20 min 40% B; 22 min 98% B; 24 min 98% B; 25 min 5% B; 30 min 5% B, where B  
716 was 0.1% formic acid in acetonitrile and the remainder of these solutions was solution A (0.1%  
717 formic acid in water). The picofrit spray was directed into a TripleTOF 6600 Quadrupole-  
718 Time-of-Flight mass spectrometer (AB SCIEX) scanning from 300-2000 m/z for 200ms,  
719 followed by 40ms MS/MS scans on the 35 most abundant multiply-charged peptides (m/z 80-  
720 1600). The mass spectrometer and HPLC system were under the control of the Analyst TF  
721 1.8 software package (AB SCIEX). The resulting MS/MS data was searched against an in-  
722 house database comprising a set of common contaminant sequences, the FLAG-tagged  
723 Arabidopsis RIN4 sequence, plus *Nicotiana* and Rat entries from Uniprot.org (183,885  
724 entries in total), using ProteinPilot version 5.0 (AB SCIEX). The peptide summary exported  
725 from ProteinPilot was further processed in Excel using a custom macro to remove proteins  
726 with Unused Scores below 1.3, eliminate inferior or redundant peptide spectral matches, and  
727 to sum the intensities for all unique peptides from each protein.

728

## 729 **Accession numbers**

730 Sequence data from this article can be found in the EMBL/GenBank data libraries under the  
731 following accession number(s): AtRIN4 (AT3G25070; NP\_001325873), GmRIN4a  
732 (Glyma03g19920; NP\_001235221), GmRIN4b (Glyma16g12160;  
733 NP\_001239973), GmRIN4c (Glyma18g36000; NP\_001235235), GmRIN4d



734 (Glyma08g46400; NP\_001235252), PvRIN4a (XP\_007134125.1), PvRIN4b  
735 (XP\_007140654.1), MdRIN4-1(NM\_001293994.1), MdRIN4-2 (NP\_001280834.1), AvrB  
736 (WP\_122390765.1), AvrRpm1<sub>Pma</sub> (NP\_114197), AvrRpm2<sub>Psa</sub> (WP\_099978761.1), RPM1  
737 (At3g07040).

738

### 739 Primers used in this study

|                         |                                                                        |
|-------------------------|------------------------------------------------------------------------|
| gAR2f1                  | CGCTATGACGTGATCGAGAA                                                   |
| gAR2r1                  | CAATACTGGCGTTGGAGTTC                                                   |
| AR2atgf1                | ATGGGTAATATATGTGGTACTTC                                                |
| AR2HA <sub>tg</sub> ar1 | TCAAGCGTAGTCTGGGACGTCGTATGGGTATCCGAAATCGTCGTCAGAATCT<br>GACTGCA        |
| gAR1f1                  | GAATTCGGCAAAAATCGTACGCAG                                               |
| AR1atgf1                | ATGGGCTGTGTATCGAGCAC                                                   |
| AR1 <sub>ta</sub> ar1   | TTAAAAGTCATCTTCTGAGTC                                                  |
| AR1HA <sub>tg</sub> ar1 | CTTATCTTAAGCGTAGTCTGGGACGTCGTATGGGTATCCAAAGTCATC<br>TTCTGAGTCAGACTGAAC |

740

### 741 SUPPLEMENTAL DATA

742 **Fig S1.** LC-MS/MS analysis of AtRIN4 co-expressed with AvrRpm1<sub>Pma</sub> in *N. benthamiana*  
743 via Agrobacterium.

744 **Fig S2.** Western blot analysis of modified RIN4 transiently co-expressed with AvrRpm1<sub>Pma</sub>  
745 in *N. benthamiana* via Agrobacterium.

746 **Fig S3.** LC-MS/MS analysis of AtRIN4 co-expressed with AvrRpm2<sub>Psa</sub> in *N. benthamiana*  
747 via Agrobacterium.

748 **Fig S4.** Western blot analysis of soybean RIN4 homologs modified by Pto DC3000Q<sup>-</sup>  
749 (AvrRpm1<sub>Pma</sub>).

750

### 751 COMPETING INTERESTS

752 The authors declare no conflict of interest.

753

754 **ACKNOWLEDGEMENT**

755 The authors thank Prof Andrew Allan and Dr Joanna Bowen of the New Zealand Institute for  
756 Plant and Food Research for critically reviewing the manuscript. This work was supported by  
757 the Plant and Food Research Fund KRIP PSA & RIN4 (P/880002/13). Further experimental  
758 details will be available upon request.

759

760 **AUTHOR CONTRIBUTIONS**

761 MY and ER conceived the study. MY designed and conducted experiments, and wrote the  
762 manuscript with input from all authors. MM conducted mass spectrometry analysis and wrote  
763 the mass spectrometry section in the Methods. ER acquired research funding, contributed to  
764 research through discussions, and edited the manuscript.

765

766 **FIGURE LEGENDS**

767 **Figure 1.** Transient co-expression of AtRIN4 and AvrRpm2<sub>Psa</sub> (biovar 5) in *N. benthamiana*  
768 via *Agrobacterium*. **A.** Sequence alignment of AvrRpm2<sub>Psa</sub> and AvrRpm1<sub>Pma</sub>. The residues  
769 (H63, Y122, and D185) in the conserved H-Y-D motif of AvrRpm1<sub>Pma</sub>, proposed previously  
770 (Cherkis et al., 2012), are marked with blue labels. The corresponding residues in the H-Y-D  
771 motif of AvrRpm2<sub>Psa</sub> are H68, Y125, and D188. **B.** Western blot analysis demonstrating the  
772 ADP-ribosyl transferase activity of AvrRpm2<sub>Psa</sub>. Proteins were extracted from *N.*  
773 *benthamiana* leaves co-expressing AvrRpm2<sub>Psa</sub>:HA and FLAG:AtRIN4 via *Agrobacterium* at  
774 2 d post infiltration. ADP-ribosylated proteins were detected using the anti ADPR binding  
775 reagent. FLAG:RIN4 and AvrRpm2<sub>Psa</sub>:HA were detected using corresponding antibodies. **C.**  
776 RPM1-mediated HR (hypersensitive response) assay. An *N. benthamiana* leaf co-expressing  
777 FLAG:AtRIN4 and RPM1:Myc with either AvrRpm1<sub>Pma</sub> or AvrRpm1<sub>Pma</sub> in different  
778 combinations (1: AvrRpm1<sub>Pma</sub><sup>WT</sup>:HA (wild type); 2: AvrRpm1<sub>Pma</sub><sup>3A</sup> (triple substitutions:  
779 H63A, Y122A, D185A); 3: AvrRpm2<sub>Psa</sub><sup>WT</sup>:HA (wild type); 4: AvrRpm2<sub>Psa</sub><sup>3A</sup> (triple  
780 substitutions: H68A, Y125A, D188A) delivered via *Agrobacterium*. Red circles denote HR  
781 and white circles denote no HR. The fluorescence of the same leaf monitored under a 488 nm  
782 tray in the ChemiDoc™ is also shown (bottom). Images were taken 2 d post *Agrobacterium*

783 infiltration. **D.** Western blot analysis using proteins extracted from the corresponding areas of  
784 the leaf used in **C** 2 d post *Agrobacterium* injection.

785 **Figure 2.** Western blot analysis of AtRIN4 transiently co-expressed with AvrRpm2<sub>Psa</sub> in *N.*  
786 *benthamiana* via *Agrobacterium*. **A.** Proteins were extracted from *N. benthamiana* leaves co-  
787 expressing FLAG:AtRIN4 with either Empty vector (lane 1), HA:AtRIN4 (lane 2), or  
788 AvrRpm2<sub>Psa</sub>:HA (lane 3) via *Agrobacterium*. Protein extracts were immunoprecipitated using  
789 anti HA magnetic beads. Precipitated proteins were probed with corresponding antibodies. **B.**  
790 Western blot analysis showed the ADP-ribosylated AtRIN4 migrated more slowly compared  
791 with unmodified AtRIN4 during SDS-PAGE. Protein extracts from *N. benthamiana* leaves  
792 co-expressing FLAG:AtRIN4 with AvrRpm2<sub>Psa</sub>:HA (even-numbered) or expressing only  
793 FLAG:AtRIN4 (odd-numbered) were probed. **C.** Western blot analysis of different  
794 AvrRpm2<sub>Psa</sub> alleles (AvrRpm2<sub>Psa</sub><sup>WT</sup>, AvrRpm2<sub>Psa</sub><sup>H68A</sup>, AvrRpm2<sub>Psa</sub><sup>Y125A</sup>, AvrRpm2<sub>Psa</sub><sup>H188A</sup>,  
795 and AvrRpm2<sub>Psa</sub><sup>3A</sup>) co-expressed with AtRIN4 via *Agrobacterium* (Input panel). For Co-IP of  
796 modified AvrRpm2 with AtRIN4 (Co-IP panels), protein extracts were precipitated using anti  
797 FLAG magnetic beads to isolate FLAG:AtRIN4. Precipitated proteins were probed using  
798 corresponding antibodies. **D.** Modified AvrRpm2 alleles (AvrRpm2<sub>Psa</sub><sup>H68A</sup>, AvrRpm2<sub>Psa</sub><sup>Y125A</sup>,  
799 and AvrRpm2<sub>Psa</sub><sup>D188A</sup>) were co-expressed with RPM1 and AtRIN4 on an *N. benthamiana* leaf  
800 to assess the corresponding RPM1-mediated HR. **E.** Combinations of modified AvrRpm2  
801 alleles (AvrRpm2<sub>Psa</sub><sup>D188A</sup> with AvrRpm2<sub>Psa</sub><sup>H68A</sup> and AvrRpm2<sub>Psa</sub><sup>D188A</sup> with AvrRpm2<sub>Psa</sub><sup>Y125A</sup>)  
802 were co-expressed with RPM1 and AtRIN4 on an *N. benthamiana* leaf. Red circles denote  
803 HR and white circles denote no HR. Images were taken at 3 d post *Agrobacterium* injection  
804 (**D** and **E**)

805 **Figure 3.** Secretion of bacterial effector via infection of *Pto* DC3000Q<sup>-</sup> in *N. benthamiana*. **A.**  
806 An *N. benthamiana* leaf was infected with *Pto* DC3000Q<sup>-</sup>(AvrRpm2<sub>Psa</sub>) at a high  
807 concentration (OD<sub>600</sub>=1.0, or 5×10<sup>8</sup> cfu/mL) in the area pre-infiltrated with *Agrobacterium* 2  
808 d earlier for transient expression of AtRIN4 (marked with a circle, bottom). Dark  
809 discolouration and leaf margin malformations indicate *Pto* infection. The control area  
810 infiltrated only with *Agrobacterium* is also marked (top). Image was taken at 15 h post  
811 infection. **B.** Western blot analysis demonstrated that AtRIN4 was ADP-ribosylated upon  
812 infection with *Pto* DC3000Q<sup>-</sup>(AvrRpm2<sub>Psa</sub>). Proteins were extracted from *N. benthamiana*  
813 leaves expressing AtRIN4 via *Agrobacterium* after infection with *Pto* DC3000Q<sup>-</sup>  
814 (AvrRpm2<sub>Psa</sub>). ADP-ribosylated proteins were detected using anti ADPR binding reagent.

815 (EV: control Pto DC3000Q<sup>-</sup> with an empty vector). **C.** Alignment of the two NOI sequences  
816 in RIN4 homologs of Arabidopsis (AtRIN4), snap bean (PvRIN4a and PvRIN4b) and  
817 soybean (GmRIN4a to GmRIN4d). **D.** Western blot analysis of RIN4 co-expressed with  
818 AvrRpm2<sub>Psa</sub> *in planta* via Agrobacterium. **E.** Western blot analysis of RIN4 homologs  
819 infected with Pto DC3000Q<sup>-</sup>(AvrRpm2<sub>Psa</sub>). Proteins were extracted as in **(B)**. **F.** The  
820 indicated RIN4 homologs were co-expressed with AvrRpm2<sub>Psa</sub> and RPM1 in different areas  
821 of an *N. benthamiana* leaf via Agrobacterium to assess the corresponding RPM1-mediated  
822 HR. Red circles denote HR and white circles denote no HR.

823 **Figure 4.** Identification of the target residue for AvrRpm2<sub>Psa</sub> by mutational analysis. **A.**  
824 Modifications generated in the two NOI sequences of AtRIN4. The ten modifications (N11A,  
825 E13A, E15A, E16A, N17A, D153A, D155A, E156A, N157A, N158A) in AtRIN4<sup>10A</sup> are  
826 boxed in black ( ) and the six modifications in AtRIN4<sup>6A</sup> (N11A, E16A, N17D, D153A,  
827 N157A, N158A) are marked with asterisk (\* in N11 and D153, previously identified by  
828 Redditt et al.) (Redditt et al., 2019) or closed circle (• in E16, N17, N157, and N158  
829 identified in this study). **B.** Western blot analysis of RIN4 proteins (AtRIN4<sup>WT</sup>, GmRIN4b<sup>WT</sup>,  
830 AtRIN4<sup>6A</sup> and AtRIN4<sup>10A</sup>) from leaves infected with with Pto DC3000Q<sup>-</sup>(AvrRpm2<sub>Psa</sub>).  
831 Proteins were extracted 1 d post infection of Pto DC3000Q<sup>-</sup>(AvrRpm2) in *N. benthamiana*  
832 leaves pre-infiltrated with Agrobacterium 2 d earlier for transient expression of RIN4. **C.**  
833 AtRIN4<sup>10A</sup> was co-expressed with AvrRpm2<sub>Psa</sub> and RPM1 in *N. benthamiana* to assess the  
834 RPM1-mediated HR. HR was assessed visually (left) or by monitoring fluorescence with  
835 ChemiDoc™ (right) at 2 d post Agrobacterium infiltration. **D.** Western blot analysis of the  
836 five AtRIN4<sup>8A</sup> variant proteins (AtRIN4<sup>8A</sup><sub>E11D153</sub>, AtRIN4<sup>8A</sup><sub>E13D155</sub>, AtRIN4<sup>8A</sup><sub>E15E156</sub>,  
837 AtRIN4<sup>8A</sup><sub>E16N157</sub>, and AtRIN4<sup>8A</sup><sub>N17N158</sub>) from leaves infected with with Pto DC3000Q<sup>-</sup>  
838 (AvrRpm2<sub>Psa</sub>). Proteins were extracted as in **(B)**. **E.** The five AtRIN4<sup>8A</sup> proteins were co-  
839 expressed with AvrRpm2<sub>Psa</sub> and RPM1 in *N. benthamiana* via Agrobacterium to assess the  
840 corresponding HR. Visual inspection (left) and fluorescence test using the ChemiDoc™  
841 (right) are shown. **F.** Western blot analysis of AtRIN4 proteins (AtRIN4<sup>WT</sup>, AtRIN4<sup>E15AE156A</sup>,  
842 AtRIN4<sup>E15A</sup>, and AtRIN4<sup>E156A</sup>) from leaves infected with Pto DC3000Q<sup>-</sup>(AvrRpm2<sub>Psa</sub>).  
843 Proteins were extracted as in **(B)**. **G.** AtRIN4 proteins (AtRIN4<sup>WT</sup>, AtRIN4<sup>E15AE156A</sup>,  
844 AtRIN4<sup>E15A</sup>, and AtRIN4<sup>E156A</sup>) were co-expressed with AvrRpm2<sub>Psa</sub> and RPM1 in *N.*  
845 *benthamiana* to assess the RPM1-mediated HR. The visual inspection (left) and the  
846 fluorescence test with the ChemiDoc™ (right) are shown. Red circles denote HR and white  
847 circles denote no HR.

848 **Figure 5.** Western blot analysis of soybean RIN4 homologs from *N. benthamiana* leaves  
849 infected with Pto DC3000Q<sup>-</sup>(AvrRpm2<sub>Psa</sub>). **A.** Sequence alignment of the nitrate-induced  
850 (NOI) sequences in RIN4 homologs of Arabidopsis (AtRIN4) and soybean (GmRIN4a,  
851 GmRIN4b, GmRIN4c, and GmRIN4d). E156 in AtRIN4 corresponds to E189 in GmRIN4c  
852 or E180 in GmRIN4d, respectively. GmRIN4a and GmRIN4b have a valine (V) at the  
853 corresponding positions. **B.** Western blot analysis of soybean RIN4 homologs after infection  
854 with Pto DC3000Q<sup>-</sup>(AvrRpm2<sub>Psa</sub>). Proteins were extracted from *N. benthamiana* leaves 1 d  
855 post infiltration of Pto DC3000Q<sup>-</sup>(AvrRpm2<sub>Psa</sub>) following Agrobacterium infiltration 2 d  
856 earlier for transient expression RIN4 homologs. **C.** Soybean RIN4 homologs were co-  
857 expressed with AvrRpm2<sub>Psa</sub> and RPM1 in *N. benthamiana* via Agrobacterium to assess the  
858 RPM1-mediated HR. The visual image was taken in 4 d post Agrobacterium infiltration. Red  
859 circles denote HR and white circles denote no HR. **D.** Western blot analysis of  
860 GmRIN4c<sup>E189A</sup> and GmRIN4d<sup>E180A</sup> from *N. benthamiana* leaves infected with Pto DC3000Q<sup>-</sup>  
861 (AvrRpm2<sub>Psa</sub>). Proteins extraction and Western blot analysis were performed as in (B). **E.**  
862 Western blot analysis of GmRIN4b<sup>V188E</sup> and GmRIN4b<sup>G16E</sup> from *N. benthamiana* leaves  
863 infected with Pto DC3000Q<sup>-</sup>(AvrRpm2<sub>Psa</sub>). Proteins extraction and Western blot analysis  
864 were performed as in (B).

865 **Figure 6.** Western blot analysis and RPM1-mediated HR assay of apple RIN4 homologs. **A.**  
866 Sequence alignment of the NOI sequences in the RIN4 homologs of Arabidopsis (AtRIN4),  
867 snap bean (PvRIN4a and PvRIN4b), soybean (GmRIN4a to GmRIN4d), and apple (MdRIN4-  
868 1 and MdRIN4-2). Both apple RIN4 loci have glutamate residues at the positions (E186 in  
869 MdRIN4-2 and E184 in MdRIN4-1) corresponding to E156 of AtRIN4. MdRIN4-2 also has a  
870 glutamate (E16) at the position corresponding to E15 of AtRIN4, while MdRIN4-1 has an  
871 alternative residue glutamine (Q16). **B.** Western blot analysis of MdRIN4-2<sup>E186A</sup> (left).  
872 Proteins were extracted 1 d post infection of Pto DC3000Q<sup>-</sup>(AvrRpm2<sub>Psa</sub>) into *N.*  
873 *benthamiana* leaves pre-infiltrated with Agrobacterium 2 d earlier for transient expression of  
874 RIN4 homologs. Apple RIN4 homologs were co-expressed with AvrRpm2<sub>Psa</sub> and RPM1 in *N.*  
875 *benthamiana* via Agrobacterium to assess the RPM1-mediated HR (right). **C.** Western blot  
876 analysis of MdRIN4-1<sup>Q16E</sup> with other RIN4 homologs (left). Protein extractions and Western  
877 blot analysis were performed as in (B). MdRIN4-1<sup>Q16E</sup> and other RIN4 homologs were co-  
878 expressed with AvrRpm2<sub>Psa</sub> and RPM1 via Agrobacterium in different areas of an *N.*  
879 *benthamiana* leaf to assess the RPM1-mediated HR.

880 **Figure 7.** Activities of the type three effectors (T3Es) triggering RPM1 activation. **A.**  
881 Western blot analysis of RIN4 homologs of Arabidopsis (AtRIN4) and soybean (GmRIIN4a  
882 to GmRIN4d) co-expressed in *N. benthamiana* via Agrobacterium. Proteins were extracted  
883 from *N. benthamiana* leaves co-expressing AvrB with RIN4 via Agrobacterium at 2 d post  
884 infiltration. **B.** Different AtRIN4 alleles (AtRIN4<sup>WT</sup>, AtRIN4<sup>E156A</sup> or AtRIN4<sup>T21AS1690AT166A</sup>)  
885 and RPM1 were co-expressed with either AvrRpm2<sub>Psa</sub> (left half) or AvrB (right half) on an *N.*  
886 *benthamiana* leaf via Agrobacterium to assess the corresponding RPM1-mediated HR. **C.**  
887 Western blot analysis of different AtRIN4 alleles (AtRIN4<sup>WT</sup>, AtRIN4<sup>E156A</sup>, AtRIN4<sup>T21A</sup>,  
888 AtRIN4<sup>T166A</sup>, AtRIN4<sup>T21AT166A</sup>, and AtRIN4<sup>T21AS1690AT166A</sup>) from *N. benthamiana* leaves  
889 infected with Pto DC3000Q<sup>-</sup>(AvrRpm2<sub>Psa</sub>) (left). Proteins were extracted 1 d post infection of  
890 Pto DC3000Q<sup>-</sup>(AvrRpm2<sub>Psa</sub>) into *N. benthamiana* leaves pre-infiltrated with Agrobacterium 2  
891 d earlier for transient expression of the RIN4 alleles. The AtRIN4 alleles were co-expressed  
892 with AvrRpm2<sub>Psa</sub> and RPM1 on different areas of an *N. benthamiana* leaf via Agrobacterium  
893 (right). **D.** Western blot analysis of AtRIN4<sup>E156A</sup> from *N. benthamiana* leaves infected with  
894 either Pto DC3000Q<sup>-</sup>(AvrRpm2<sub>Psa</sub>) or by Pto DC3000Q<sup>-</sup>(AvrRpm1<sub>Pma</sub>) (left). AtRIN4<sup>E156A</sup>  
895 and RPM1 were co-expressed with either AvrRpm2<sub>Psa</sub> or AvrRpm1<sub>Pma</sub> on different areas of an  
896 *N. benthamiana* leaf to assess the RPM1-mediated HR (right). Red circles denote HR and  
897 white circles denote no HR.

898 **Figure 8.** Activity and physical association of AvrRpm2<sub>Psa</sub> alleles. **A.** Sequence alignment of  
899 AvrRpm2<sub>Psa</sub> alleles from different Psa biovars. The biovar1 and biovar3 alleles were edited to  
900 express corresponding full-length proteins by removing extra nucleotides. The corrected sites  
901 are marked in black. The two residues H68 and Y125 are marked in blue and D188 is in  
902 green. All other substitutions are marked in red. **B.** Western blot analysis of AtRIN4 co-  
903 expressed with different AvrRpm2<sub>Psa</sub> alleles (input panel). Proteins were extracted 2 d after  
904 co-infiltration of AtRIN4 and AvrRpm2<sub>Psa</sub> in *N. benthamiana* via Agrobacterium. Co-IP of  
905 AtRIN4 with different AvrRpm2<sub>Psa</sub> proteins (Co-IP panel). Proteins were immunoprecipitated  
906 using anti FLAG magnetic beads to isolate AtRIN4. The precipitated proteins were probed  
907 using corresponding antibodies. **C.** AvrRpm2<sub>Psa</sub> alleles from different Psa biovars were co-  
908 expressed with AtRIN4 and RPM1 via Agrobacterium on different areas of an *N.*  
909 *benthamiana* leaf to assess the RPM1-mediated HR. Red circles denote HR, white circles  
910 denote no HR, and orange circle denotes reduced HR. Visual inspection (left) and  
911 fluorescence detection monitored in the ChemiDoc™ system (right) were shown.

912

### 913 **Supplemental Data**

914 **Figure S1.** LC-MS/MS analysis of AtRIN4 co-expressed with AvrRpm1<sub>Pma</sub> in *N.*  
915 *benthamiana* via agrobacterium. **A.** A Coomassie Brilliant Blue (CBB) stained SDS-PAGE  
916 gel after immunoprecipitation of protein extracts from *N. benthamiana* leaves co-infiltrated  
917 with FLAG:AtRIN4 and AvrRpm1<sub>Pma</sub> via agrobacterium (EV: empty vector). **B.**  
918 Confirmation of excised FLAG:AtRIN4 by Western blot analysis using anti FLAG antibody.  
919 FLAG:AtRIN4 band was excised from the gel and boiled in 2× sampling buffer for 5 min (IP).  
920 **C.** Summary of fragment ions in the LC-MS/MS spectra of the modified AtRIN4 peptides  
921 (not all fragmentations are shown). ADP-ribose moieties were identified at N157, N158, and  
922 N17. Fragmentation evidence also suggested that either E15 or E16 was modified in one  
923 peptide (top). **D.** An example of LC-MS/MS fragmentation evidence, showing N17 was  
924 modified with a ribose derived from ADP-ribose. (ADP-R: ADP-ribose, P-R: phospho-ribose,  
925 R: ribose, y: y-ions, b: b-ions).

926 **Figure S2.** Western blot analysis of modified RIN4 transiently co-expressed with  
927 AvrRpm1<sub>Pma</sub> in *N. benthamiana* via Agrobacterium. **A.** Western blot of proteins extracted  
928 from *N. benthamiana* leaves co-expressing AvrRpm1<sub>Pma</sub> with GmRIN4b<sup>N12AD185A</sup> or  
929 AtRIN4<sup>N11AD153A</sup>, modified based on previous mass spectrometry analyses (Redditt et al.,  
930 2019), via agrobacterium. **B.** Western blot of proteins extracted from *N. benthamiana* leaves  
931 co-expressing AvrRpm1<sub>Pma</sub> with AtRIN4<sup>E16AN17AN157AN158A</sup>, modified based on our mass  
932 spectrometry analysis, or AtRIN4<sup>E11AE16AN17AD153N157AN158A</sup>, with all collectively identified  
933 residues blocked, via agrobacterium. **C.** Modified RIN4 homologs (GmRIN4b<sup>N12AD185A</sup>,  
934 AtRIN4<sup>N11AD153A</sup>, and AtRIN4<sup>E16AN17AN157AN158A</sup>) and unmodified RIN4 homologs  
935 (AtRIN4<sup>WT</sup> and GmRIN4b<sup>WT</sup>) were co-expressed with RPM1 and AvrRpm1<sub>Pma</sub> in *N.*  
936 *benthamiana* via agrobacterium. YFP was also co-expressed with RPM1 and AvrRpm1<sub>Pma</sub> as  
937 a negative control for RPM1-mediated response. Red circles denote HR and white circle  
938 denotes no HR.

939 **Figure S3.** LC-MS/MS analysis of AtRIN4 co-expressed with AvrRpm2<sub>Psa</sub> in *N.*  
940 *benthamiana* via agrobacterium. **A.** Summary of fragment ions in the LC-MS/MS spectra of  
941 the modified AtRIN4 peptides. The locations of the targets predicted from the LC-MS/MS  
942 fragmentation are marked with blue boxes. Identified ADP-ribose moieties are labelled in

943 orange. **B.** An example of fragmentation evidence suggesting the target site is either D155,  
944 E156, N157, or N158 in this peptide. (ADP-R: ADP-ribose, R: ribose, y: y-ions, b: b-ions).

945 **Figure S4.** Western blot analysis of soybean RIN4 homologs modified by Pto DC3000Q<sup>-</sup>  
946 (AvrRpm1<sub>Pma</sub>). Proteins were extracted from *N. benthamiana* leaves infected with Pto  
947 DC3000Q<sup>-</sup>(AvrRpm1<sub>Pma</sub>) in 1 d post infection, following Agrobacterium infiltration 2 d  
948 earlier for transient expression of RIN4 homologs.

949



## Parsed Citations

- Abelleira, A., Ares, A., Aguin, O., Penalver, J., Morente, M.C., Lopez, M.M., Sainz, M.J., and Mansilla, J.P. (2015).** Detection and characterization of *Pseudomonas syringae* pv. *actinidifoliorum* in kiwifruit in Spain. *J Appl Microbiol* 119, 1659-1671.  
Google Scholar: [Author Only](#) [Title Only](#) [Author and Title](#)
- Afzal, A.J., Kim, J.H., and Mackey, D. (2013).** The role of NOI-domain containing proteins in plant immune signaling. *BMC Genomics* 14, 327.  
Google Scholar: [Author Only](#) [Title Only](#) [Author and Title](#)
- Alfano, J.R., and Collmer, A. (2004).** Type III secretion system effector proteins: double agents in bacterial disease and plant defense. *Annu Rev Phytopathol* 42, 385-414.  
Google Scholar: [Author Only](#) [Title Only](#) [Author and Title](#)
- Ausubel, F.M. (2005).** Are innate immune signaling pathways in plants and animals conserved? *Nat Immunol* 6, 973-979.  
Google Scholar: [Author Only](#) [Title Only](#) [Author and Title](#)
- Baltrus, D.A., Nishimura, M.T., Romanchuk, A., Chang, J.H., Mukhtar, M.S., Cherkis, K., Roach, J., Grant, S.R., Jones, C.D., and Dangl, J.L. (2011).** Dynamic evolution of pathogenicity revealed by sequencing and comparative genomics of 19 *Pseudomonas syringae* isolates. *PLoS Pathog* 7, e1002132.  
Google Scholar: [Author Only](#) [Title Only](#) [Author and Title](#)
- Belkhadir, Y., Subramaniam, R., and Dangl, J.L. (2004).** Plant disease resistance protein signaling: NBS-LRR proteins and their partners. *Current Opinion in Plant Biology* 7, 391-399.  
Google Scholar: [Author Only](#) [Title Only](#) [Author and Title](#)
- Bent, A.F., and Mackey, D. (2007).** Elicitors, effectors, and R genes: The new paradigm and a lifetime supply of questions. *Annual Review of Phytopathology* 45, 399-436.  
Google Scholar: [Author Only](#) [Title Only](#) [Author and Title](#)
- Block, A., and Alfano, J.R. (2011).** Plant targets for *Pseudomonas syringae* type III effectors: virulence targets or guarded decoys? *Curr Opin Microbiol* 14, 39-46.  
Google Scholar: [Author Only](#) [Title Only](#) [Author and Title](#)
- Block, A., Li, G., Fu, Z.Q., and Alfano, J.R. (2008).** Phytopathogen type III effector weaponry and their plant targets. *Curr Opin Plant Biol* 11, 396-403.  
Google Scholar: [Author Only](#) [Title Only](#) [Author and Title](#)
- Buscaill, P., Sanguankiatichai, N., Lee, Y.J., Kourelis, J., Preston, G., and van der Hoorn, R.A.L. (2021).** Agromonas: a rapid disease assay for *Pseudomonas syringae* growth in agroinfiltrated leaves. *Plant J* 105, 831-840.  
Google Scholar: [Author Only](#) [Title Only](#) [Author and Title](#)
- Buttner, D. (2012).** Protein export according to schedule: architecture, assembly, and regulation of type III secretion systems from plant- and animal-pathogenic bacteria. *Microbiol Mol Biol Rev* 76, 262-310.  
Google Scholar: [Author Only](#) [Title Only](#) [Author and Title](#)
- Cherkis, K.A., Temple, B.R., Chung, E.H., Sondek, J., and Dangl, J.L. (2012).** AvrRpm1 missense mutations weakly activate RPS2-mediated immune response in *Arabidopsis thaliana*. *PLoS One* 7, e42633.  
Google Scholar: [Author Only](#) [Title Only](#) [Author and Title](#)
- Chung, E.H., El-Kasmi, F., He, Y., Loehr, A., and Dangl, J.L. (2014).** A plant phosphoswitch platform repeatedly targeted by type III effector proteins regulates the output of both tiers of plant immune receptors. *Cell Host Microbe* 16, 484-494.  
Google Scholar: [Author Only](#) [Title Only](#) [Author and Title](#)
- Chung, E.H., da Cunha, L., Wu, A.J., Gao, Z., Cherkis, K., Afzal, A.J., Mackey, D., and Dangl, J.L. (2011).** Specific threonine phosphorylation of a host target by two unrelated type III effectors activates a host innate immune receptor in plants. *Cell Host Microbe* 9, 125-136.  
Google Scholar: [Author Only](#) [Title Only](#) [Author and Title](#)
- Cohen, M.S., and Chang, P. (2018).** Insights into the biogenesis, function, and regulation of ADP-ribosylation. *Nat Chem Biol* 14, 236-243.  
Google Scholar: [Author Only](#) [Title Only](#) [Author and Title](#)
- Coombes, B.K. (2009).** Type III secretion systems in symbiotic adaptation of pathogenic and non-pathogenic bacteria. *Trends Microbiol* 17, 89-94.  
Google Scholar: [Author Only](#) [Title Only](#) [Author and Title](#)
- Cui, H., Tsuda, K., and Parker, J.E. (2015).** Effector-triggered immunity: from pathogen perception to robust defense. *Annu Rev Plant Biol* 66, 487-511.  
Google Scholar: [Author Only](#) [Title Only](#) [Author and Title](#)
- Cunnac, S., Lindeberg, M., and Collmer, A. (2009).** *Pseudomonas syringae* type III secretion system effectors: repertoires in search of functions. *Current Opinion in Microbiology* 12, 53-60.

Google Scholar: [Author Only](#) [Title Only](#) [Author and Title](#)

**Dangl, J.L., and Jones, J.D. (2001). Plant pathogens and integrated defence responses to infection. *Nature* 411, 826-833.**

Google Scholar: [Author Only](#) [Title Only](#) [Author and Title](#)

**DeYoung, B.J., and Innes, R.W. (2006). Plant NBS-LRR proteins in pathogen sensing and host defense. *Nat Immunol* 7, 1243-1249.**

Google Scholar: [Author Only](#) [Title Only](#) [Author and Title](#)

**Dharmaraj, K. (2018). Functional characterization of *Pseudomonas syringae* pv. *actinidiae* effectors AvrPto5 and HopF2 (New Zealand: The University of Auckland).**

Google Scholar: [Author Only](#) [Title Only](#) [Author and Title](#)

**Dodds, P.N., and Rathjen, J.P. (2010). Plant immunity: towards an integrated view of plant-pathogen interactions. *Nat Rev Genet* 11, 539-548.**

Google Scholar: [Author Only](#) [Title Only](#) [Author and Title](#)

**Doll, S., and Burlingame, A.L. (2015). Mass spectrometry-based detection and assignment of protein posttranslational modifications. *ACS Chem Biol* 10, 63-71.**

Google Scholar: [Author Only](#) [Title Only](#) [Author and Title](#)

**Donati, I., Cellini, A., Sangiorgio, D., Vanneste, J.L., Scortichini, M., Balestra, G.M., and Spinelli, F. (2020). *Pseudomonas syringae* pv. *actinidiae*: Ecology, Infection Dynamics and Disease Epidemiology. *Microb Ecol* 80, 81-102.**

Google Scholar: [Author Only](#) [Title Only](#) [Author and Title](#)

**Fang, Y., Zhu, X., and Wang, Y. (1990). Preliminary studies on kiwifruit diseases in Hunan province. *Sichuan Fruit Science and Technology* 18, 28-29.**

Google Scholar: [Author Only](#) [Title Only](#) [Author and Title](#)

**Felix, G., Duran, J.D., Volko, S., and Boller, T. (1999). Plants have a sensitive perception system for the most conserved domain of bacterial flagellin. *Plant J* 18, 265-276.**

Google Scholar: [Author Only](#) [Title Only](#) [Author and Title](#)

**Feng, B., Liu, C., Shan, L., and He, P. (2016). Protein ADP-Ribosylation Takes Control in Plant-Bacterium Interactions. *PLoS Pathog* 12, e1005941.**

Google Scholar: [Author Only](#) [Title Only](#) [Author and Title](#)

**Fujikawa, T., and Sawada, H. (2016). Genome analysis of the kiwifruit canker pathogen *Pseudomonas syringae* pv. *actinidiae* biovar 5. *Sci Rep* 6, 21399.**

Google Scholar: [Author Only](#) [Title Only](#) [Author and Title](#)

**Fujikawa, T., and Sawada, H. (2019). Genome analysis of *Pseudomonas syringae* pv. *actinidiae* biovar 6, which produces the phytotoxins, phaseolotoxin and coronatine. *Sci Rep* 9, 3836.**

Google Scholar: [Author Only](#) [Title Only](#) [Author and Title](#)

**Garrity-Ryan, L., Shafikhani, S., Balachandran, P., Nguyen, L., Oza, J., Jakobsen, T., Sargent, J., Fang, X., Cordwell, S., Matthey, M.A., and Engel, J.N. (2004). The ADP ribosyltransferase domain of *Pseudomonas aeruginosa* ExoT contributes to its biological activities. *Infect Immun* 72, 546-558.**

Google Scholar: [Author Only](#) [Title Only](#) [Author and Title](#)

**Guo, M., Tian, F., Wamboldt, Y., and Alfano, J.R. (2009). The Majority of the Type III Effector Inventory of *Pseudomonas syringae* pv. *tomato* DC3000 Can Suppress Plant Immunity. *Mol Plant Microbe In* 22, 1069-1080.**

Google Scholar: [Author Only](#) [Title Only](#) [Author and Title](#)

**Hendriks, I.A., Larsen, S.C., and Nielsen, M.L. (2019). An Advanced Strategy for Comprehensive Profiling of ADP-ribosylation Sites Using Mass Spectrometry-based Proteomics. *Mol Cell Proteomics* 18, 1010-1026.**

Google Scholar: [Author Only](#) [Title Only](#) [Author and Title](#)

**Hottiger, M.O., Hassa, P.O., Luscher, B., Schuler, H., and Koch-Nolte, F. (2010). Toward a unified nomenclature for mammalian ADP-ribosyltransferases. *Trends Biochem Sci* 35, 208-219.**

Google Scholar: [Author Only](#) [Title Only](#) [Author and Title](#)

**Ingle, R.A., Carstens, M., and Denby, K.J. (2006). PAMP recognition and the plant-pathogen arms race. *Bioessays* 28, 880-889.**

Google Scholar: [Author Only](#) [Title Only](#) [Author and Title](#)

**Kim, M.G., da Cunha, L., McFall, A.J., Belkhadir, Y., DebRoy, S., Dangl, J.L., and Mackey, D. (2005). Two *Pseudomonas syringae* type III effectors inhibit RIN4-regulated basal defense in *Arabidopsis*. *Cell* 121, 749-759.**

Google Scholar: [Author Only](#) [Title Only](#) [Author and Title](#)

**Koh, Y., Cha, B., Chung, H., and Lee, D. (1994). Outbreak and spread of bacterial canker in kiwifruit. *Korean Journal of Plant Pathology* 10, 68-72.**

Google Scholar: [Author Only](#) [Title Only](#) [Author and Title](#)

**Kong, L., Rodrigues, B., Kim, J.H., He, P., and Shan, L. (2021). More than an on-and-off switch: Post-translational modifications of plant pattern recognition receptor complexes. *Curr Opin Plant Biol* 63, 102051.**

Google Scholar: [Author Only](#) [Title Only](#) [Author and Title](#)

Lee, C.C., Wood, M.D., Ng, K., Andersen, C.B., Liu, Y., Luginbuhl, P., Spraggon, G., and Katagiri, F. (2004). Crystal structure of the type III effector AvrB from *Pseudomonas syringae*. *Structure* 12, 487-494.

Google Scholar: [Author Only](#) [Title Only](#) [Author and Title](#)

Lee, D., Bourdais, G., Yu, G., Robatzek, S., and Coaker, G. (2015a). Phosphorylation of the Plant Immune Regulator RPM1-INTERACTING PROTEIN4 Enhances Plant Plasma Membrane H(+)-ATPase Activity and Inhibits Flagellin-Triggered Immune Responses in *Arabidopsis*. *Plant Cell* 27, 2042-2056.

Google Scholar: [Author Only](#) [Title Only](#) [Author and Title](#)

Lee, J., Manning, A.J., Wolfgeher, D., Jelenska, J., Cavanaugh, K.A., Xu, H., Fernandez, S.M., Michelmore, R.W., Kron, S.J., and Greenberg, J.T. (2015b). Acetylation of an NB-LRR Plant Immune-Effector Complex Suppresses Immunity. *Cell Rep* 13, 1670-1682.

Google Scholar: [Author Only](#) [Title Only](#) [Author and Title](#)

Lindeberg, M., Cunnac, S., and Collmer, A. (2012). *Pseudomonas syringae* type III effector repertoires: last words in endless arguments. *Trends Microbiol* 20, 199-208.

Google Scholar: [Author Only](#) [Title Only](#) [Author and Title](#)

Liu, J., Elmore, J.M., Lin, Z.J., and Coaker, G. (2011). A receptor-like cytoplasmic kinase phosphorylates the host target RIN4, leading to the activation of a plant innate immune receptor. *Cell Host Microbe* 9, 137-146.

Google Scholar: [Author Only](#) [Title Only](#) [Author and Title](#)

Macho, A.P., and Zipfel, C. (2015). Targeting of plant pattern recognition receptor-triggered immunity by bacterial type-III secretion system effectors. *Curr Opin Microbiol* 23, 14-22.

Google Scholar: [Author Only](#) [Title Only](#) [Author and Title](#)

Mackey, D., Holt, B.F., 3rd, Wiig, A., and Dangl, J.L. (2002). RIN4 interacts with *Pseudomonas syringae* type III effector molecules and is required for RPM1-mediated resistance in *Arabidopsis*. *Cell* 108, 743-754.

Google Scholar: [Author Only](#) [Title Only](#) [Author and Title](#)

Mackey, D., Belkhadir, Y., Alonso, J.M., Ecker, J.R., and Dangl, J.L. (2003). *Arabidopsis* RIN4 is a target of the type III virulence effector AvrRpt2 and modulates RPS2-mediated resistance. *Cell* 112, 379-389.

Google Scholar: [Author Only](#) [Title Only](#) [Author and Title](#)

Malinovsky, F.G., Fangel, J.U., and Willats, W.G. (2014). The role of the cell wall in plant immunity. *Front Plant Sci* 5, 178.

Google Scholar: [Author Only](#) [Title Only](#) [Author and Title](#)

Mansfield, J., Genin, S., Magori, S., Citovsky, V., Sriariyanum, M., Ronald, P., Dow, M., Verdier, V., Beer, S.V., Machado, M.A., Toth, I., Salmund, G., and Foster, G.D. (2012). Top 10 plant pathogenic bacteria in molecular plant pathology. *Mol Plant Pathol* 13, 614-629.

Google Scholar: [Author Only](#) [Title Only](#) [Author and Title](#)

McCann, H.C., Li, L., Liu, Y., Li, D., Pan, H., Zhong, C., Rikkerink, E.H.A., Templeton, M.D., Straub, C., Colombi, E., Rainey, P.B., and Huang, H. (2017). Origin and Evolution of the Kiwifruit Canker Pandemic. *Genome Biol Evol* 9, 932-944.

Google Scholar: [Author Only](#) [Title Only](#) [Author and Title](#)

McCann, H.C., Rikkerink, E.H., Bertels, F., Fiers, M., Lu, A., Rees-George, J., Andersen, M.T., Gleave, A.P., Haubold, B., Wohlers, M.W., Guttman, D.S., Wang, P.W., Straub, C., Vanneste, J.L., Rainey, P.B., and Templeton, M.D. (2013). Genomic analysis of the Kiwifruit pathogen *Pseudomonas syringae* pv. *actinidiae* provides insight into the origins of an emergent plant disease. *PLoS Pathog* 9, e1003503.

Google Scholar: [Author Only](#) [Title Only](#) [Author and Title](#)

Mikolcevic, P., Hlousek-Kasun, A., Ahel, I., and Mikoc, A. (2021). ADP-ribosylation systems in bacteria and viruses. *Comput Struct Biotechnol J* 19, 2366-2383.

Google Scholar: [Author Only](#) [Title Only](#) [Author and Title](#)

Puhar, A., and Sansonetti, P.J. (2014). Type III secretion system. *Curr Biol* 24, R784-791.

Google Scholar: [Author Only](#) [Title Only](#) [Author and Title](#)

Ray, S.K., Macoy, D.M., Kim, W.Y., Lee, S.Y., and Kim, M.G. (2019). Role of RIN4 in Regulating PAMP-Triggered Immunity and Effector-Triggered Immunity: Current Status and Future Perspectives. *Mol Cells* 42, 503-511.

Google Scholar: [Author Only](#) [Title Only](#) [Author and Title](#)

Redditt, T.J., Chung, E.H., Karimi, H.Z., Rodibaugh, N., Zhang, Y., Trinidad, J.C., Kim, J.H., Zhou, Q., Shen, M., Dangl, J.L., Mackey, D., and Innes, R.W. (2019). AvrRpm1 Functions as an ADP-Ribosyl Transferase to Modify NOI Domain-Containing Proteins, Including *Arabidopsis* and Soybean RPM1-Interacting Protein4. *Plant Cell* 31, 2664-2681.

Google Scholar: [Author Only](#) [Title Only](#) [Author and Title](#)

Ribet, D., and Cossart, P. (2010). Post-translational modifications in host cells during bacterial infection. *Febs Letters* 584, 2748-2758.

Google Scholar: [Author Only](#) [Title Only](#) [Author and Title](#)

Rikkerink, E.H.A. (2018). Pathogens and Disease Play Havoc on the Host Epiproteome-The "First Line of Response" Role for Proteomic Changes Influenced by Disorder. *Int J Mol Sci* 19.

Google Scholar: [Author Only](#) [Title Only](#) [Author and Title](#)

Rosenthal, F., Nanni, P., Barkow-Oesterreicher, S., and Hottiger, M.O. (2015). Optimization of LTQ-Orbitrap Mass Spectrometer Parameters for the Identification of ADP-Ribosylation Sites. *J Proteome Res* 14, 4072-4079.

Google Scholar: [Author Only Title Only Author and Title](#)

Scortichini, M. (1994). Occurrence of *Pseudomonas syringae* pv. *actinidiae* on Kiwifruit in Italy. *Plant Pathol* 43, 1035–1038.

Google Scholar: [Author Only Title Only Author and Title](#)

Serizawa, S., Ichikawa, T., Takikawa, Y., Tsuyumu, S., and Goto, M. (1989). Occurrence of bacterial canker of kiwifruit in Japan: description of symptoms, isolation of the pathogen and screening of bactericides. *Annals of the Phytopathological Society of Japan* 55, 427-436

Google Scholar: [Author Only Title Only Author and Title](#)

Simon, N.C., Aktories, K., and Barbieri, J.T. (2014). Novel bacterial ADP-ribosylating toxins: structure and function. *Nat Rev Microbiol* 12, 599-611.

Google Scholar: [Author Only Title Only Author and Title](#)

Sun, X., Greenwood, D.R., Templeton, M.D., Libich, D.S., McGhie, T.K., Xue, B., Yoon, M., Cui, W., Kirk, C.A., Jones, W.T., Uversky, V.N., and Rikkerink, E.H. (2014). The intrinsically disordered structural platform of the plant defence hub protein RPM1-interacting protein 4 provides insights into its mode of action in the host-pathogen interface and evolution of the nitrate-induced domain protein family. *FEBS J* 281, 3955-3979.

Google Scholar: [Author Only Title Only Author and Title](#)

Toruno, T.Y., Shen, M., Coaker, G., and Mackey, D. (2019). Regulated Disorder: Posttranslational Modifications Control the RIN4 Plant Immune Signaling Hub. *Mol Plant Microbe Interact* 32, 56-64.

Google Scholar: [Author Only Title Only Author and Title](#)

van der Hoorn, R.A., and Kamoun, S. (2008). From Guard to Decoy: a new model for perception of plant pathogen effectors. *Plant Cell* 20, 2009-2017.

Google Scholar: [Author Only Title Only Author and Title](#)

Vanneste, J.L., Yu, J., Cornish, D.A., Tanner, D.J., Windner, R., Chapman, J.R., Taylor, R.K., Mackay, J.F., and Dowlut, S. (2013). Identification, Virulence, and Distribution of Two Biovars of *Pseudomonas syringae* pv. *actinidiae* in New Zealand. *Plant Dis* 97, 708-719.

Google Scholar: [Author Only Title Only Author and Title](#)

Wei, C.F., Kvitko, B.H., Shimizu, R., Crabill, E., Alfano, J.R., Lin, N.C., Martin, G.B., Huang, H.C., and Collmer, A. (2007). A *Pseudomonas syringae* pv. *tomato* DC3000 mutant lacking the type III effector HopQ1-1 is able to cause disease in the model plant *Nicotiana benthamiana*. *Plant J* 51, 32-46.

Google Scholar: [Author Only Title Only Author and Title](#)

Wilton, M., Subramaniam, R., Elmore, J., Felsensteiner, C., Coaker, G., and Desveaux, D. (2010). The type III effector HopF2Pto targets *Arabidopsis* RIN4 protein to promote *Pseudomonas syringae* virulence. *Proc Natl Acad Sci U S A* 107, 2349-2354.

Google Scholar: [Author Only Title Only Author and Title](#)

Xu, N., Luo, X., Li, W., Wang, Z., and Liu, J. (2017). The Bacterial Effector AvrB-Induced RIN4 Hyperphosphorylation Is Mediated by a Receptor-Like Cytoplasmic Kinase Complex in *Arabidopsis*. *Mol Plant Microbe Interact* 30, 502-512.

Google Scholar: [Author Only Title Only Author and Title](#)

Yoon, M., and Rikkerink, E.H.A. (2020). Rpa1 mediates an immune response to *avrRpm1Psa* and confers resistance against *Pseudomonas syringae* pv. *actinidiae*. *Plant J* 102, 688-702.

Google Scholar: [Author Only Title Only Author and Title](#)

Yu, T.Y., Sun, M.K., and Liang, L.K. (2021). Receptors in the Induction of the Plant Innate Immunity. *Mol Plant Microbe Interact*, MPMI07200173CR.

Google Scholar: [Author Only Title Only Author and Title](#)

Zhao, G., Guo, D., Wang, L., Li, H., Wang, C., and Guo, X. (2021). Functions of RPM1-interacting protein 4 in plant immunity. *Planta* 253, 11.

Google Scholar: [Author Only Title Only Author and Title](#)
